## **Sex peptide receptor is not required for refractoriness to remating or induction of egg laying in *Aedes aegypti***

I. Alexandra Amaro<sup>1\*</sup>, Margot P. Wohl<sup>2\*</sup>, Sylvie Pitcher<sup>1</sup>, Catalina Alfonso-Parra<sup>1,3,4</sup>, Frank W. Avila<sup>5,4</sup>, Andrew S. Paige<sup>6</sup>, Michelle Helinski<sup>1,7</sup>, Laura B. Duvall<sup>6#</sup>, Laura C. Harrington<sup>1#</sup>, Mariana F. Wolfner<sup>5#</sup>, Conor J. McMeniman<sup>2, 8#</sup>

1 - Department of Entomology, Cornell University, Ithaca, NY, 14853, USA

2 - W. Harry Feinstone Department of Molecular Microbiology and Immunology, Johns Hopkins Malaria Research Institute, Johns Hopkins Bloomberg School of Public Health, Johns Hopkins University, Baltimore, MD 21205, USA

3 – Current address: Instituto Colombiano de Medicina Tropical, Universidad CES, Sabaneta, 055413, Colombia

4- Current address: Max Planck Tandem Group in Mosquito Reproductive Biology, Universidad de Antioquia, Medellín, 050010, Colombia.

5 - Department of Molecular Biology and Genetics, Cornell University, Ithaca, NY, 14853

6 - Department of Biological Sciences, Columbia University, New York, NY, 10027 USA

7- Current address: European & Developing Countries Clinical Trials Partnership (EDCTP), The Hague, The Netherlands

8 - The Solomon H. Snyder Department of Neuroscience, Johns Hopkins University School of Medicine, Baltimore, MD, USA

\* - These authors contributed equally. They are listed alphabetically.

# - Corresponding Authors

[lbd2126@columbia.edu](mailto:lbd2126@columbia.edu)

[lch27@cornell.edu](mailto:lch27@cornell.edu)

[mfw5@cornell.edu](mailto:mfw5@cornell.edu)

[cmcmeni1@jhu.edu](mailto:cmcmeni1@jhu.edu)

Running head (50 characters)

SPR not required for *A. aegypti* post-mating behaviors

Keywords: *Aedes aegypti*, sex peptide, mating receptivity, oviposition, reproduction

## 1 **Abstract**

2           Across diverse insect taxa, the behavior and physiology of females dramatically  
3 changes after mating – processes largely triggered by the transfer of seminal proteins  
4 from their mates. In the vinegar fly *Drosophila melanogaster*, the seminal protein sex  
5 peptide (SP) decreases the likelihood of female flies remating and causes additional  
6 behavioral and physiological changes that promote fertility including increasing egg  
7 production. Although SP is only found in the *Drosophila* genus, its receptor, sex peptide  
8 receptor (SPR), is the widely-conserved myoinhibitory peptide (MIP) receptor. To test  
9 the functional role of SPR in mediating post-mating responses in a non-*Drosophila*  
10 dipteran, we generated two independent *Spr*-knockout alleles in the yellow fever  
11 mosquito *Aedes aegypti*. Although SPR is needed for post-mating responses in  
12 *Drosophila* and the cotton bollworm *Helicoverpa armigera*, *Spr* mutant *Ae. aegypti* show  
13 completely normal post-mating decreases in remating propensity and increases in egg  
14 laying. In addition, injection of synthetic SP or accessory gland homogenate from *D.*  
15 *melanogaster* into virgin female mosquitoes did not elicit these post-mating responses.  
16 Our results indicate that *Spr* is not required for these canonical post-mating responses  
17 in *Ae. aegypti*, indicating that unknown signaling pathways are likely responsible for  
18 these behavioral switches in this disease vector.

19

20

## 21 **Introduction**

22 Female insects undergo major changes after mating that alter their behavior and  
23 physiology, ultimately contributing to successful reproduction. Much of our  
24 understanding of these changes comes from work in *Drosophila melanogaster*, where  
25 post-mating changes are primarily initiated by seminal fluid proteins derived from male  
26 reproductive organs and transferred to females within the ejaculate (reviewed in AVILA  
27 *ET AL.* 2011; WIGBY *ET AL.* 2020). Many post-mating changes in *D. melanogaster* are  
28 induced by a 36 amino acid seminal “sex peptide” (SP); its most emblematic effects are  
29 decreasing the female’s receptivity to remating and increasing her egg production  
30 (CHEN *et al.* 1988; CHAPMAN *et al.* 2003; LIU AND KUBLI 2003). SP exerts many of its  
31 effects through a G protein-coupled receptor, SPR (the sex peptide receptor) that is  
32 expressed in neurons as well as in reproductive tract tissues (YAPICI *et al.* 2008;  
33 HASEMEYER *et al.* 2009; YANG *et al.* 2009).

34 Impairment or loss of SPR in *D. melanogaster* leads to a reduction in post-mating  
35 egg laying, and to refractoriness to remating (YAPICI *et al.* 2008), as well as impairing  
36 additional post-mating changes in sleep patterns (GARBE *et al.* 2016), sperm release  
37 (AVILA *et al.* 2015), long-term memory (SCHEUNEMANN *et al.* 2019), and gut growth  
38 (WHITE *et al.* 2021). These responses have been shown to be integrated largely through  
39 the Sex-Peptide sensory and abdominal ganglion neurons (SPSN-SAG network) (FENG  
40 *et al.* 2014; WANG *et al.* 2020; WANG *et al.* 2021; reviewed in OKAMOTO AND WATANABE  
41 2022). Consistent with the rapid evolution seen for many reproductive proteins (e.g.  
42 CIVETTA AND SINGH 1998; SWANSON AND VACQUIER 2002; HAERTY *et al.* 2007), SP is only  
43 found in some species of *Drosophila* (TSUDA AND AIGAKI 2016). However, SPR is

44 conserved across several *Drosophila* species (KIM *et al.* 2010) and other insects (YAPICI  
45 *et al.* 2008). This widespread sequence conservation likely reflects SPR's role as a  
46 myoinhibitory peptide (MIP) receptor, which has been considered to be its ancestral  
47 function. It is suggested that SPR was hijacked or co-opted to a reproductive function in  
48 lineages where it acquired expression in the female reproductive tract (KIM *et al.* 2010;  
49 POELS *et al.* 2010; TSUDA AND AIGAKI 2016). Experiments aimed at investigating a  
50 reproductive role for MIPs suggest that they do not induce post-mating responses, as  
51 mating receptivity was not altered by either pan-neuronal knockdown of MIPs or  
52 injection of MIPs in *D. melanogaster* females (KIM *et al.* 2010).

53 SPR has also been found to be important for post-mating responses in some  
54 insects in addition to *Drosophila*. RNAi knockdown of SPR expression in olive fruit flies  
55 (*Bactrocera oleae*) and Oriental fruit flies (*Bactrocera dorsalis*) led to lower oviposition  
56 rates (ZHENG *et al.* 2015; GREGORIOU AND MATHIOPOULOS 2020). Additionally, mutation of  
57 the SPR gene in *B. dorsalis* resulted in a reduction in egg-laying ability, viability of eggs  
58 laid, and underdeveloped ovaries (CHEN *et al.* 2023). Injection of *D. melanogaster* SP  
59 into the cotton bollworm, *Helicoverpa armigera* (which has no obvious SP gene in its  
60 genome) suppressed sex pheromone production leading to decreased calling  
61 behaviors; these effects did not occur if SPR was knocked down simultaneous with SP  
62 injection, indicating SP function is through SPR (HANIN *et al.* 2012). Moreover, *H.*  
63 *armigera* females with little to no SPR laid significantly fewer eggs after mating and  
64 displayed altered pheromone calling behavior and remating rates after 24 and 48 h  
65 (HANIN *et al.* 2012; LIU *et al.* 2021). A reproductive role for SPR was also reported in the  
66 tobacco cutworm (*Spodoptera litura*): females with SPR knockdown laid fewer eggs

67 than controls after injection of male accessory gland lysate and remained receptive to  
68 mating (LI *et al.* 2014).

69 Collectively, these studies indicate that SPR plays important post-mating roles in  
70 several insect taxa. However, the role of SPR in medically important mosquitoes, such  
71 as *Aedes aegypti*, has not been determined. If SPR is involved in inducing post-mating  
72 responses it could potentially be a target for mosquito reproductive control efforts  
73 (CATOR *et al.* 2021). RNASeq analyses of *Ae. aegypti* have identified SPR transcripts in  
74 neuronal and reproductive tissues (ALFONSO-PARRA *et al.* 2016; MATTHEWS *et al.* 2016),  
75 consistent with its expression patterns in those *Drosophila* species where it exerts a  
76 reproductive role (TSUDA *et al.* 2015). Although the *Ae. aegypti* genome does not  
77 contain a recognizable SP gene (our unpublished genome searches), neither does the  
78 genome of *H. armigera*, where SPR is necessary for inducing post-mating responses  
79 (HANIN *et al.* 2012; LIU *et al.* 2021).

80 To test the functional role of SPR in mediating *Ae. aegypti* post-mating  
81 responses, we employed CRISPR/Cas9 genome editing to generate two independent  
82 mutant alleles in the SPR gene. We tested female mutants for fertility and survival, as  
83 well as for the most salient reproductive phenotypes: post-mating egg laying and  
84 decreased mating receptivity, both of which are induced by seminal fluid proteins (CRAIG  
85 1967; LEAHY AND CRAIG 1965; HELINSKI *et al.* 2012; VILLARREAL *et al.* 2018). Our data  
86 indicate that despite the sequence conservation of SPR, it does not play a detectable  
87 role in these post-mating changes in *Ae. aegypti*. Consistent with this conclusion, our  
88 injection of synthetic *Drosophila* SP, which can bind to and activate *Ae. aegypti* SPR *in*  
89 *vitro* (YAPICI *et al.* 2008; KIM *et al.* 2010) or of *Drosophila* male accessory gland extracts

90 into virgin or gravid *Ae. aegypti* females gave no effect on these post-mating behaviors.  
91 The lack of effects of SPR knockout on post-mating egg-laying and receptivity in this  
92 dipteran, in contrast to its activity in the dipteran *D. melanogaster* and the lepidopteran  
93 species *H. armigera* and *S. litura*, suggests that SPR may have been repetitively co-  
94 opted for a reproductive function. Our results indicate that unknown signaling pathways  
95 are likely responsible for the post-mating switches governing long-term refractoriness to  
96 remating and induction of egg laying in *Ae. aegypti*.

97

## 98 **Materials and methods**

99 Our groups generated *Spr* knockout alleles and characterized them independently.  
100 These mutant alleles, which were unique and in different genetic backgrounds, yielded  
101 the same results where compared. We refer to these alleles, generated at Cornell and  
102 Johns Hopkins respectively, as *Spr*<sup>A235</sup> and *Spr*<sup>ECFP</sup>.

103

## 104 **Mosquito rearing**

105 *Spr*<sup>A235</sup>: The *Spr*<sup>A235</sup> NHEJ allele was generated in a Thai background (e.g. HELINSKI AND  
106 HARRINGTON 2011), and its controls and backcrosses were of that background. Our Thai  
107 colony of *Ae. aegypti* derived from field-collected mosquitoes (15°72'N, 101°75'E)  
108 maintained since 2009 with annual supplementation and a homozygous transgenic line  
109 with dsRed-labelled sperm (SMITH *et al.* 2007) were used. After vacuum-hatching eggs,  
110 larvae were reared under uniform conditions to ensure medium body size adults  
111 (HELINSKI AND HARRINGTON 2011). Mosquitoes were maintained at 28°C and 70% RH  
112 with a 10 h light:10 h dark cycle that included two hours of simulated dusk and dawn.  
113 Virgin males and females were obtained by separating pupae by sex prior to adult

114 eclosion. All mosquitoes were maintained on 10% w/v sucrose. Biological replicates  
115 were derived from independently hatched cohorts.

116

117 *Spr<sup>ECFP</sup>*: The *Spr<sup>ECFP</sup>* HDR allele was generated in the *LVPib12* strain (NENE *et al.* 2007),  
118 which also served as the genetic background for assays with this mutant allele.  
119 Mosquitoes were maintained with a 12 h light:dark photoperiod at 27°C and 80% relative  
120 humidity using a standardized rearing protocol (WOHL AND MCMENIMAN 2023a). Adult  
121 mosquitoes were provided constant access to a 10% w/v sucrose solution and virgins  
122 were isolated as pupae and sexed within 12 h of emergence. The *Exu-Cas9* strain  
123 (marked with Opie2-dsRed) expressing *Cas9* under the maternal germline promoter  
124 *exuperantia* (LI *et al.* 2017) was used for CRISPR/Cas9 mutagenesis. *Exu-Cas9* was  
125 backcrossed to *LVPib12* each generation for stock maintenance.

126

### 127 **SPR mutant generation via CRISPR**

128 *Spr<sup>Δ235</sup>*: We generated a mosquito line harboring a NHEJ-based deletion in exon 2 of  
129 *Spr* (AAEL019881), by CRISPR/Cas9-based editing according to the procedures in  
130 Kistler *et al.* (2015). Two sites for Cas9 cleavage targeting exon 2 were identified using  
131 CHOPCHOP (LABUN *et al.* 2016) and validated *in vivo*. Guide RNAs were synthesized *in*  
132 *vitro* using the MEGAScript kit (Thermo Fisher Scientific) from DNA generated from a  
133 template-free PCR consisting of a primer targeting the Cas9 cut site with a T7 promoter  
134 and a universal reverse primer (sequences listed in Table 1). After reaction purification  
135 with MEGAClear (Thermo Fisher Scientific) and size confirmation using a Bioanalyzer  
136 2100 (Agilent Technologies), 40 ng/ul each of the two gRNAs together with 333 ng/ul

137 Cas9 (PNA Bio) was injected into Thai strain embryos by the University of Maryland  
138 Insect Transformation Facility (<https://www.ibbr.umd.edu/facilities/itf>). After G<sub>0</sub> females  
139 were backcrossed to Thai wild type males, blood fed and allowed to lay eggs, genomic  
140 DNA from the G<sub>0</sub> mosquitoes was extracted using Puregene reagents (Qiagen) and  
141 PCR was used to detect deletions in the *Spr* gene (Table S1, Fig S1A). Eggs from  
142 deletion-positive females were hatched and back-crossed for five generations.  
143 Heterozygous males and females were crossed, and progeny screened for genotype  
144 using genomic DNA extracted from a single leg (SMITH *et al.* 2018). Males and females  
145 homozygous for the *Spr* deletion were crossed together to generate a stable mutant line  
146 (*Spr*<sup>Δ235/Δ235</sup>). A wild type control line (*Spr*<sup>+/+</sup>) derived from a backcross of heterozygous  
147 *Spr*<sup>Δ235/+</sup> individuals was also maintained. *Spr*<sup>Δ235</sup> heterozygotes (*Spr*<sup>Δ235/+</sup>), derived  
148 from a cross between *Spr*<sup>Δ235</sup> homozygotes and this wild type line, served as an  
149 additional control.  
150  
151 *Spr*<sup>ECFP</sup>: We generated a disruptive insertion in exon 2 of *Spr* using CRISPR/Cas9-  
152 mediated homologous recombination. Guide RNAs were designed targeting exon 2 of  
153 *Spr* using CHOPCHOP (LABUN *et al.* 2016) and validated individually with *in vitro*  
154 cleavage assays using a PCR amplicon spanning the putative cut sites, each *in vitro*  
155 transcribed gRNA (MEGAscript, Invitrogen) and Cas9 protein (PNA bio). A single gRNA  
156 with validated cleavage activity was chosen for incorporation into a synthetic gBlock  
157 (IDT) that contained the *Ae. aegypti* U6 (AAEL017774) promoter, a modified gRNA  
158 scaffold and a terminator (CHEN *et al.* 2021) for subsequent subcloning into the  
159 backbone of the following HDR donor plasmid. We first integrated homology arms into



160 the base donor plasmid pSL1180-HR-PUB-ECFP (Addgene #47917) (McMENIMAN *et al.*  
161 2014). Homology arms 1425 bp (left) and 1797 bp (right) in length flanking the gRNA  
162 cut site were amplified with CloneAmp (Takara) from a consensus genomic DNA clone  
163 covering *Spr* exon 2 and flanking introns (primers listed in Table S2). We PCR-amplified  
164 the gBlock using primers with 5' InFusion adaptors (Table S2). Next, we integrated the  
165 gBlock fragment with the U6 expression cassette into the backbone of this donor  
166 plasmid at the NdeI restriction site using InFusion cloning. This yielded a final construct  
167 (pMW001) containing a U6 expression cassette and HDR cassette targeting *Spr* exon 2.  
168  
169 We microinjected 300 ng/ul of pMW001 (endotoxin-free) into the posterior pole of *Exu-*  
170 *Cas9* pre-blastoderm stage embryos (*LVPib12* strain) using an Eppendorf FemtoJet 4X.  
171 Transformed G<sub>1</sub> larvae with constitutive ECFP fluorescence were identified by screening  
172 for fluorescent bodies (PUB-ECFP) at the L3-L4 stage. Transgenic animals were then  
173 outcrossed to *LVPib12* for two generations before crossing the lines to generate a  
174 homozygous viable *Spr* mutant strain (*Spr*<sup>ECFP/ECFP</sup>). Insertion of the disruptive donor  
175 cassette into *Spr* exon 2 was confirmed by PCR amplification of genomic DNA using a  
176 three primer genotyping strategy (Table 2, Fig S1B) where one forward primer was  
177 centered on the CRISPR cut site so that it would only anneal to the wild type allele, one  
178 forward primer was placed in the polyubiquitin (PUB) sequence in the integrated cassette,  
179 and one reverse primer was nested in the right homology arm. This yielded a 342 bp  
180 amplicon for the wild type allele with an intact gRNA site, and a 524 bp amplicon for the  
181 mutant allele.  
182

### 183 **Mating, fertility, and body size of the *Spr*<sup>Δ235</sup> allele in Thai background**

184 Mating was examined by mating *en masse* two-to-three-day-old homozygous  
185 (*Spr*<sup>Δ235/Δ235</sup>) or heterozygous (*Spr*<sup>Δ235/+</sup>) females to three-to-four-day-old heterozygous  
186 males. Mating was performed in an 8 L container for 24 h in the absence of 10%  
187 sucrose. Mated females were dissected to confirm mating status by scoring the  
188 presence of sperm in the spermathecae. Eggs from both homozygous and  
189 heterozygous females mated to heterozygous males had similar hatch rates. Two  
190 biological replicates were performed from independently hatched cohorts. To determine  
191 relative body sizes of the mosquitoes, we used wing-length measurements as a proxy  
192 (NASCI 1990).

193

### 194 **Post-mating receptivity**

195 *Spr*<sup>Δ235</sup> allele in Thai background: A single two-to-three-day-old homozygous  
196 (*Spr*<sup>Δ235/Δ235</sup>) or heterozygous (*Spr*<sup>Δ235/+</sup>) female was released into an 8 L container with  
197 10 three-to-four-day-old heterozygous (*Spr*<sup>Δ235/+</sup>) males and observed closely. Once the  
198 female mated (maintained a copula for >8 sec), the mating pair was immediately  
199 collected and the female was placed in a 0.5 L cup. The mated male was excluded from  
200 additional matings and the mating arena was replenished with an additional virgin male.  
201 Two three-to-four-day-old males with dsRed-marked sperm were introduced into each  
202 0.5 L cup either immediately or 24 h after the first female mating and then held together  
203 for 24 h. The lower reproductive tract of each female was then dissected and the  
204 spermathecae and bursa examined under a fluorescence microscope for the presence  
205 of red sperm along with non-fluorescent sperm, indicative of remating. As a control,

206 individual virgin homozygous females or virgin heterozygous females with two dsRed-  
207 sperm males were placed together in 0.5 L cups for 24 h (n=10 for each genotype for  
208 each replicate) and the dissected reproductive tracts of females were examined to make  
209 sure the dsRed-sperm males could mate successfully with *Spr*<sup>4235</sup> mutant females. Two  
210 biological replicates from independently hatched cohorts were conducted. The genotype  
211 order of initial matings was reversed in replicate two to avoid bias.

212

213 *Spr*<sup>ECFP</sup> in LVPib12 background: To similarly test if *Spr*<sup>ECFP</sup> mutants were refractory to  
214 remating, a single four-to-five-day-old homozygous (*Spr*<sup>ECFP/ECFP</sup>) or heterozygous  
215 (*Spr*<sup>ECFP/+</sup>) female was released into a 355 ml insulated solo cup with 10 five-to-six-day-  
216 old wild type (*Spr*<sup>+/+</sup>) *LVPib12* males and observed closely. Once the female mated  
217 (maintained a copula for >8 sec), the mating pair was immediately collected. The male  
218 was removed and discarded, and the female was placed in a separate solo cup with  
219 other newly mated females. This mating scheme was then replicated until the target  
220 number of copulated females per genotype was obtained. After 1-1.5 h following their  
221 first mating, these females were introduced into a 20.3 x 20.3 x 20.3 cm cage (Bioquip,  
222 1450A) with five-to-six-day-old males with dsRed-marked sperm (SMITH *et al.* 2007).  
223 The female to male ratio was 1:2 and they were held together for 24 h at which point  
224 males were removed by aspiration. The lower reproductive tract of each female was  
225 then dissected and the spermathecae examined under a fluorescence microscope for  
226 the presence of red sperm, indicative of remating.

227

228 Control matings were performed between homozygous ( $Spr^{ECFP/ECFP}$ ) females (n=32)  
229 and wild type ( $Spr^{+/+}$ ) *LVPib12* males as described above to estimate insemination rates  
230 after the first mating (31/32 mated). As a supplemental control to validate mating  
231 compatibility in this post-mating receptivity assay, homozygous ( $Spr^{ECFP/ECFP}$ ) females  
232 (n=20) were placed with two times the number dsRed-sperm males in a 20.3 x 20.3 x  
233 20.3 cm cage (Bioquip, 1450A) for 24 h and the dissected reproductive tracts of females  
234 were examined for the presence of red sperm (20/20 mated). Finally, twenty virgin  
235 females of each genotype ( $Spr^{ECFP/ECFP}$  and  $Spr^{ECFP/+}$ ) were dissected to confirm  
236 virginity (20/20 for each genotype were unmated).

237

### 238 **$Spr^{ECFP}$ Oviposition Assays**

239 For oviposition assays with virgin or mated wild type ( $Spr^{+/+}$ ), heterozygous ( $Spr^{ECFP/+}$ )  
240 or homozygous ( $Spr^{ECFP/ECFP}$ ) females, three-to-five day old females were blood fed to  
241 repletion using anesthetized Swiss-Webster mice (Johns Hopkins University Animal  
242 Care and Use Committee, Approval Number: MO21H373). For assays with mated  
243 females, all crosses were made between virgin females of the target genotype and two-  
244 day-old wild type virgin males. Crosses were established with a sex ratio of 1 female: 2  
245 males in a 20.3 x 20.3 x 20.3 cm cage (Bioquip, 1450A) with constant access to 10%  
246 sucrose. These small group crosses were left to mate for 48h before blood feeding the  
247 females. 72 hours post blood feeding, females were placed in single oviposition vials,  
248 each containing a filter paper cone moistened with 4mL dH<sub>2</sub>O (WOHL AND MCMENIMAN  
249 2023b). Females were allowed to lay eggs on the filter paper for 48 hours at which point  
250 they were removed from vials and eggs were counted. Egg papers from females who

251 died before collection were not counted. Counts were analyzed statistically as described  
252 below.

253

254 ***Drosophila sex peptide injection.*** Synthetic sex peptide (3 pmol; CanPeptide) in 69 nl  
255 *Aedes* saline (HAYES 1953) was injected into the thorax of virgin two-to-five-day-old Thai  
256 background *Ae. aegypti* (n=18) and Canton S *D. melanogaster* females (n=30) with a  
257 Nanoject II (Drummond, Broomall, PA). Controls included injection with *Aedes* saline  
258 and a non-injected group. Males were introduced (ratio 1:1) 12 h after injection. Mating  
259 events were confirmed by immediate direct observation for *Drosophila*. The number of  
260 eggs laid by females in the treatment groups was recorded. *Ae. aegypti* females were  
261 examined for sperm presence or absence after being held with males for two days.

262

263 To independently test if *D. melanogaster* sex peptide (dSP) could induce oviposition  
264 behavior in the *Ae. aegypti* *LVPib12* genetic background, we injected synthetic dSP  
265 (Aapptec, sequence: WEWPWNRKOTKFOIOSONORDKWCRNLNLGPAWGGRC with a  
266 disulfide bridge between the two cysteines) (CHEN *et al.* 1988) dissolved in PBS (Gibco,  
267 pH 7.2) into the thorax of virgin females. We injected a concentration series spanning the  
268 dynamic range of dSP concentrations known to elicit oviposition responses in *D.*  
269 *melanogaster*. Specifically, we performed 150 nl injections of 10  $\mu$ M, 100  $\mu$ M and 1 mM  
270 dSP which equates to 1.5 pmol, 15 pmol and 150 pmol of dSP respectively. First, three-  
271 to-five-day-old virgin females were blood fed using anesthetized Swiss-Webster mice,  
272 and 48 h later, synthetic dSP or *D. melanogaster* male accessory gland homogenate  
273 (dMAG), *Ae. aegypti* male abdominal tip (aeMAT) homogenate (preparation described in

274 next section) and PBS controls were injected into the thorax with a Nanoject II  
275 (Drummond). Oviposition was assayed as described above.

276

### 277 **Accessory Gland Homogenate Injection Assays**

278 We tested both the effects of injecting *Drosophila* and *Aedes* male accessory gland  
279 (MAG) homogenates on mating and egg laying:

280

281 To first evaluate the effect of *Drosophila* MAG (dMAG) on Thai *Ae. aegypti* mating  
282 behavior and oviposition, accessory glands were dissected from 38 six-day-old virgin *D.*  
283 *melanogaster* Canton S males in 38  $\mu$ l *Aedes* saline (HAYES 1953). The tissues were  
284 ground, sonicated in a water bath for 15 sec, and then spun at 13,400 rpm for 15 minutes  
285 at 0°C. The supernatant was removed and virgin Thai *Ae. aegypti* females (three-to-six  
286 days old) were injected in the thorax with 0.25  $\mu$ l of *D. melanogaster* homogenate  
287 (equivalent to 0.25 of an accessory gland). Females injected with *Aedes* saline were used  
288 as controls as well as females injected with *Ae. aegypti* male accessory gland extract  
289 (aeMAG); and females that were mated without injection. Females were divided into two  
290 cohorts. One group was tested for refractoriness to mating by placing females in individual  
291 0.5 L cups with males (aged seven-to-nine days) 3 days after injection for 2 days (n=10).  
292 Two days later, females were removed and their spermathecae dissected to determine  
293 insemination status. The other group was tested for oviposition behavior. Females were  
294 blood fed on a human arm (M.E.H.) 4 days after injection. Unfed females were removed  
295 and offered blood the following day. Three to four days after feeding, fed females were  
296 placed in individual cups (0.5 L) for oviposition. Four days later, females were removed

297 and the number of eggs for each female was counted. Live females with zero eggs were  
298 dissected to determine insemination status (only when females had been exposed to  
299 males) and for the presence of fully developed eggs in ovaries. Virgin females injected  
300 with saline and non-injected females mated with males from the same cohort were used  
301 as controls.

302

303 In the second independent assessment of the impact of *Drosophila* and *Aedes* accessory  
304 gland extracts on egg laying, *Drosophila* MAGs were prepared by dissecting accessory  
305 glands from 50 fly abdomens (Canton-S strain) into 50 ul of PBS (Gibco, pH 7.2) and  
306 homogenized with a pellet pestle motor (Kimble). This mixture was centrifuged at 14,000  
307 x g for 30 minutes at 4°C. The supernatant was applied to a 0.22 um filter column  
308 (Millipore) and centrifuged at 14,000 x g for 10 minutes at 4°C. The liquid flow through  
309 (dMAG) was kept at 4°C and injected within one week of preparation. *Aedes* accessory  
310 gland homogenates were prepared using an identical protocol from three-to-five-day-old  
311 *LVPib12* virgin males that had been anesthetized on ice with the following modifications:  
312 The male abdominal tip (MAT) was dissected into a drop of PBS by grasping the genital  
313 claspers with forceps and pulling the terminal abdominal segment away from the rest of  
314 the abdomen. This isolated the last segment of the abdomen including the male  
315 accessory glands and other reproductive organs. MAT from 200 males were dissected  
316 into 200 uL PBS (Gibco, pH 7.2) on ice (HELINSKI *et al.* 2012). The liquid flow through  
317 (aeMAT) was kept at 4°C and injected within two weeks of preparation.

318

319 To test if SPR is required for the post-mating reduction in mating receptivity resulting  
320 from injection of *Ae. aegypti* MAG (aeMAG) homogenate, Thai wild type and *Spr*<sup>Δ235</sup>  
321 homozygous females were injected with aeMAG as previously described (AMARO *et al.*  
322 2021). Modified PBS buffer alone (137 mM NaCl, 2.7 mM KCl, 10 mM Na<sub>2</sub>HPO<sub>4</sub>, 3 mM  
323 KH<sub>2</sub>PO<sub>4</sub>, 2 mM CaCl<sub>2</sub> pH 7.0) served as a control. Two days after injection, females  
324 were blood fed on a human host (S.P.) for 8 minutes, fully-engorged females were  
325 separated individually into 0.5 L cups and 2 wild type Thai males were introduced 5  
326 days post-blood feeding. After 2 days female spermathecae were dissected and scored  
327 for the presence or absence of sperm.

328

### 329 **Cell-based assays**

330 Cell-based assays were performed as in Duvall *et al.* (2019). Briefly, HEK293T cells  
331 (Thermo Fisher Scientific) were maintained using standard protocols in a Thermo  
332 Scientific water jacketed carbon dioxide incubator. Cells were transiently transfected  
333 with 0.5 μg each of plasmid expressing GCaMP6s (CHEN *et al.* 2013), mouse Gqα15  
334 (OFFERMANN AND SIMON 1995), and SPR (AAEL019881) using Lipofectamine 2000  
335 (Invitrogen). Transfected cells were seeded into 96 well plates (Greiner Bio-one) and  
336 incubated overnight in Fluorobrite DMEM media (Thermo Fisher Scientific)  
337 supplemented with Fetal Bovine Serum (Invitrogen) at 37°C and 5% carbon dioxide.  
338 Cells were directly imaged in 60μL Fluorobrite DMEM media (Thermo Fisher Scientific)  
339 using GFP-channel fluorescence of a BioTek Synergy Neo plate reader with liquid  
340 handling system and automated dispenser. Peptides were prepared at 3x concentration  
341 in reading buffer [Hank's Balanced Salt Solution (GIBCO), 20mM HEPES (Sigma-



342 Aldrich), pH 7.4]. Wells were imaged every 0.5 seconds for 3 minutes in kinetic mode.  
343 30 $\mu$ L of peptide was added to each well after 15 seconds of baseline fluorescence  
344 recording. Normalized responses were calculated as  $(\Delta F/F_0)_{\text{experimental}} - (\Delta F/F_0)_{\text{no receptor}}$   
345 control. AstAR (AAEL006076) response to Ast1 was used as a positive control in each  
346 plate. *Ae. aegypti* peptides previously detected in Predel *et al.* (2010) and tested *in vitro*  
347 in Duvall *et al.* (2019) were synthesized by Bachem and maintained as lyophilized  
348 powders or 100% dimethyl sulfoxide (DMSO) (Sigma-Aldrich) concentrated stock  
349 solutions at -20°C. All peptides were tested at a 10  $\mu$ M final concentration with < 1%  
350 DMSO final concentration. 11 – 14 replicates were performed/transfection and each  
351 experimental well included matched positive and negative (no receptor transfected)  
352 control wells in the same plate. Any well in which the matched positive control response  
353 was < 0 was excluded from analysis.

354

355 **Data analysis.** Power analysis using G\*power (FAUL *et al.* 2007) was used to  
356 determine appropriate sample size prior to experiments based on preliminary data.  
357 Statistical analysis was performed using SPSS (IBM Statistics, version 25). A Levene's  
358 test was first performed to determine homoscedasticity of male and female body size  
359 data, then wing lengths were compared with Kruskal-Wallis and Mann-Whitney tests.  
360 Replicate effects were analyzed and replicates were combined when appropriate.  
361 Remating was analyzed using a binary generalized linear mixed model to compare  
362 differences by time points and genotype (*Spr* <sup>$\Delta 235/\Delta 235$</sup>  or heterozygous (*Spr* <sup>$\Delta 235/+$</sup> ); to  
363 compare remating in the *Spr*<sup>*ECFP*</sup> mutants vs. wild type, a two sample proportions test  
364 was performed. Egg counts from oviposition assays were analyzed with Graphpad

365 Prism 9.4.1 software with a one-way ANOVA followed by *post-hoc* t-tests between  
366 experimental groups. *P* values were adjusted for multiple comparisons with Dunnett's  
367 correction when the comparisons were all against a control group; and adjusted with  
368 Tukey's correction when comparisons were made between experimental groups. In cell-  
369 based assays fluorescence signal responses were analyzed with Graphpad Prism 9.3.1  
370 software with one sample t and Wilcoxon Signed Rank test.

371

## 372 **Results**

### 373 **Generation and characterization of *Aedes aegypti* *Spr* mutants**

374 To test whether sex peptide receptor (SPR) is required for canonical post-mating  
375 receptivity and egg laying behaviors in *Ae. aegypti*, we generated two independent  
376 mutant alleles in the wild type *Spr* gene locus using CRISPR/Cas9 mutagenesis (Fig  
377 1A).

378

379 We first generated a NHEJ allele (*Spr*<sup>Δ235</sup>) in the Thai *Ae. aegypti* genetic background  
380 by injecting two gRNAs targeting exon 2 of *Spr* (the first coding exon of this gene) along  
381 with Cas9 protein into pre-blastoderm stage embryos (Fig 1B). Subsequently using PCR  
382 genotyping (Fig S1A), we successfully recovered the *Spr*<sup>Δ235</sup> mutant allele consisting of  
383 a 235 bp deletion (bp 50-285 in the open reading frame) with an insertion of 15 bp in  
384 this exon.

385

386 We next generated an independent HDR allele (*Spr*<sup>ECFP</sup>) in the *LVPib12 Ae. aegypti*  
387 genetic background by injecting a donor construct with a gRNA expression cassette in

388 its backbone into pre-blastoderm stage embryos from the germline *Exu-Cas9 Ae.*  
389 *aegypti* strain (Fig 1C). In this allele, a 2617 bp cassette was inserted by homology-  
390 dependent repair into exon 2 of *Spr*. This disruptive insertion included a stop cassette  
391 and marks mutants visibly with enhanced cyan fluorescent protein (ECFP) (Fig 1C) and  
392 can be detected in the *Spr* locus by a custom genotyping assay using PCR (Fig S1B).  
393  
394 Predicted amino acid alignments indicate that relative to the wild type *Spr*<sup>+</sup> allele, both  
395 *Spr*<sup>Δ235</sup> and *Spr*<sup>ECFP</sup> mutant alleles are likely truncated before the first predicted  
396 transmembrane domain of SPR (Fig 1D). Specifically, the *Spr*<sup>Δ235</sup> allele has a frameshift  
397 mutation in the *Spr* coding sequence that yields a premature stop codon at amino acid  
398 28, while precise insertion of a stop codon in *Spr*<sup>ECFP</sup> directly after amino acid 47 is  
399 similarly predicted to prematurely terminate translation.

400

#### 401 ***Spr* knockout mutants are viable and fertile.**

402 We determined that both of the *Spr* mutant alleles that we generated (*Spr*<sup>Δ235</sup> and  
403 *Spr*<sup>ECFP</sup>) were homozygous viable. We have successfully maintained these homozygous  
404 mutant lines for more than six years and one year respectively since their  
405 establishment, using standard protocols.

406

407 Detailed morphometric and fitness characterization of the *Spr*<sup>Δ235</sup> allele, revealed that  
408 homozygous mutant males were smaller (average = 1.99 to 2.16 mm wing length) than  
409 wild type (*Spr*<sup>+/+</sup>) or heterozygous (*Spr*<sup>Δ235/+</sup>) males reared under same conditions (2.13  
410 to 2.23 mm) across replicates and remating experiments; Z = -3.79, P<0.00 (wild type),

411 Z = -4.05, P<0.00 (heterozygous). Mutant females were smaller in body size compared  
412 to wild type and *Spr*<sup>Δ235/+</sup> females in replicate 1: *Spr*<sup>Δ235/Δ235</sup> female = 2.53 ± 0.15 mm;  
413 *Spr*<sup>+/+</sup> female = 2.78 ± 0.20 mm (Z = -4.039, df <0.01), but not significantly different in  
414 Replicate 2: *Spr*<sup>Δ235/+</sup> female = 2.9 ± 0.06 mm; *Spr*<sup>Δ235/Δ235</sup> female = 2.88 ± 0.08; *Spr*<sup>+/+</sup>  
415 female = 2.91 ± 0.05. Mutant females mated successfully with males at the same  
416 percentage as controls, as demonstrated by the presence of sperm in their  
417 spermathecae after 24 h [96% *Spr*<sup>Δ235/Δ235</sup> (87/90) and 99% *Spr*<sup>Δ235/+</sup> (91/92) females  
418 mated with *Spr*<sup>Δ235/+</sup> males].

419

#### 420 **SPR *in vitro* response screen**

421 The smaller body size of our *Spr* mutants prompted us to investigate the nature of the  
422 ligand of SPR. Work from Kim *et al.* (2010) suggests that *Aedes* SPR can be potently  
423 activated by non-SP, non-MIP ligands found in whole mosquito extracts. We performed  
424 *in vitro* assays to profile *Ae. aegypti* SPR responses to various classes of  
425 neuropeptides. We expressed *Ae. aegypti* SPR cDNA in HEK293T cells co-transfected  
426 with a promiscuous G protein (OFFERMANN AND SIMON 1995) and the genetically  
427 encoded calcium sensor GCaMP6s (CHEN *et al.* 2013). Activation of a given receptor is  
428 read out by calcium-induced increase in fluorescence of GCaMP6s. SPR responses  
429 were profiled to a 10μM dose of 50 known neuropeptides. Although modest responses  
430 were noted to several neuropeptides (Ast3, AT, sNPF1, sNPF2+4, TKRP2, TKRP3),  
431 these showed low efficacy compared to positive controls (AstAR activation by Ast1  
432 peptide) (Fig S2). We did not observe activation by MIP peptides tested, nor by HP-I, a  
433 peptide known to play a role in short-term receptivity suppression (DUVALL *et al.* 2017).

434 We did not identify additional high efficacy agonists of SPR among our neuropeptide  
435 panel.

436

437 ***Spr* knockout females show normal changes in post-mating refractoriness.**

438 Mated *Ae. aegypti* females quickly become refractory to subsequent mating (CRAIG  
439 1967; HELINSKI *et al.* 2012; DEGNER AND HARRINGTON 2016). While initial changes are  
440 induced by a seminal peptide HP-1 (DUVALL *et al.* 2017), this effect is temporary, acting  
441 only within one hour of mating. The nature of the molecule(s) that induce(s) lifelong  
442 refractoriness in these females is unknown.

443

444 We initially observed that *Spr*<sup>Δ235/Δ235</sup> homozygous mutant females are as likely to mate  
445 with a second male as are *Spr*<sup>Δ235/+</sup> control females, regardless of the time after the first  
446 mating (Fig 2A; p = 0.88 and p = 0.18 for tests immediately, and 24 h, after mating,  
447 respectively). To confirm this result, we injected male accessory gland homogenate,  
448 which is known to induce mating refractoriness (HELINSKI *et al.* 2012), from wild type  
449 Thai males into both *Spr*<sup>Δ235/Δ235</sup> and wild type Thai females and found no difference in  
450 mating receptivity when males were presented 5 days after injection [*Spr*<sup>Δ235/Δ235</sup>, 1.37%  
451 females remated (n = 74); wild type, 1.16% females remated (n = 86)].

452

453 Similarly, we observed in an independent post-mating receptivity assay, that  
454 *Spr*<sup>ECFP/ECFP</sup> homozygous mutant females are as likely to mate with a second male as  
455 are *Spr*<sup>ECFP/+</sup> control females (Fig 2B; Z = 0.88, p = 0.37). In this assay, females were

456 tested for their propensity to remate within 1-1.5 h after initial mating and we similarly  
457 detected no significant differences in post-mating receptivity.

458

459 Thus, *Spr* does not seem to be necessary for induction of post-mating refractoriness,  
460 including short, medium or long-term refractoriness, in *Ae. aegypti* females.

461

462 ***Spr* is not required for egg laying in *Aedes aegypti*.**

463 Mating stimulates oviposition in gravid *Aedes aegypti* females (LANG 1956; JUDSON  
464 1967), and this effect is mediated by unknown protein/s transferred to females in male  
465 accessory gland fluid (LEAHY AND CRAIG 1965; HISS AND FUCHS 1972). To test whether  
466 SPR is required for post-mating oviposition behavior in *Ae. aegypti*, we next tested  
467 whether egg laying was impacted using the *Spr*<sup>ECFP</sup> mutant allele.

468

469 We determined that gravid wild type *Spr*<sup>+/+</sup>, heterozygous *Spr*<sup>ECFP/+</sup> and homozygous  
470 *Spr*<sup>ECFP/ECFP</sup> mutant females laid very few eggs if they were not mated:  $6.5 \pm 6.5$ ,  $8.8 \pm$   
471  $4.9$  and  $17.5 \pm 8.8$  eggs, respectively (mean  $\pm$  S.E.M., Fig 2C). We hypothesized that if  
472 SPR was required for post-mating oviposition behavior, homozygous *Spr*<sup>ECFP/ECFP</sup>  
473 females would not lay eggs even after mating. However, the number of eggs laid by  
474 mated homozygous *Spr* mutant females ( $90.4 \pm 10.0$  eggs) was not significantly  
475 different from that laid by heterozygous ( $92.9 \pm 3.1$  eggs, comparison:  $p = 1.000$ ) or wild  
476 type females (mean:  $105.3 \pm 3.5$ , comparison:  $p = 0.774$ ) (mean eggs  $\pm$  S.E.M., Fig  
477 2C).

478

479 We conclude that SPR is not required for post-mating oviposition in *Ae. aegypti*.

480

481 **Neither *Drosophila melanogaster* sex peptide nor male accessory gland**

482 **homogenate induces mating refractoriness in *Aedes aegypti* females.**

483 We next tested whether injection of synthetic *D. melanogaster* SP (dSP) could induce

484 mating refractoriness in *Ae. aegypti*, as demonstrated for *D. melanogaster* and *H.*

485 *armigera* (CHEN *et al.* 1988; SCHMIDT *et al.* 1993; FAN *et al.* 1999; FAN *et al.* 2000).

486

487 We first confirmed activity of synthetic dSP by injecting 3 pmol (or saline) into 30 virgin

488 *D. melanogaster* and assessing activity. Mating refractoriness assays revealed that only

489 6.6% of SP-injected *D. melanogaster* female flies mated, compared with 63% of those

490 injected with saline. Similarly in egg laying assays, 46.7% of SP-injected *D.*

491 *melanogaster* virgin female flies laid eggs compared to 0% of *D. melanogaster* females

492 injected with saline. These data are all consistent with previous reports of the effects of

493 dSP on mating refractoriness and egg laying in *D. melanogaster* (CHEN *et al.* 1988;

494 SCHMIDT *et al.* 1993; LIU AND KUBLI 2003).

495

496 We then examined the effect of injecting synthetic dSP (3 pmol) or saline vehicle on

497 mating refractoriness in the Thai *Ae. aegypti* strain using virgin females. In these

498 assays, at 12 h post-injection, injected females were allowed to mate for 48 h and

499 afterwards, females were dissected and examined for sperm in their spermathecae. We

500 observed that sperm were present in all dSP-injected and all saline-injected females,

501 indicating that dSP had no effect on *Ae. aegypti* mating receptivity in this context (Fig  
502 3A).

503

504 Consistent with our results with synthetic SP, when 0.25 male *D. melanogaster* male  
505 accessory gland (dMAG) equivalents were injected into virgin Thai *Ae. aegypti* females  
506 (0.25 ul homogenate), we also found no effect of dMAG on mating receptivity (Fig 3B).

507 We conclude that intrathoracic injection of synthetic dSP as well as homogenate from  
508 dMAG, the source of endogenous SP, is insufficient to induce mating refractoriness in  
509 *Ae. aegypti*.

510

511 **Neither *Drosophila melanogaster* sex peptide nor male accessory gland**  
512 **homogenate induces egg laying in *Aedes aegypti* females.**

513 Intrathoracic injection of *Ae. aegypti* male accessory gland homogenate has previously  
514 been shown to be sufficient to stimulate oviposition behavior in virgin gravid *Ae. aegypti*  
515 females (LEAHY AND CRAIG 1965; JUDSON 1967; HISS AND FUCHS 1972). Independently,  
516 our two groups next assessed whether intrathoracic injection of *D. melanogaster*  
517 homogenates putatively representing the complement of seminal fluid proteins from this  
518 species, inclusive of dSP, could similarly act to induce oviposition in virgin *Ae. aegypti*  
519 females.

520

521 In our first assay series in the Thai *Ae. aegypti* strain, we confirmed that injection of *Ae.*  
522 *aegypti* accessory gland homogenate (aeMAG) triggers oviposition from virgin gravid  
523 females ( $66.0 \pm 8.0$ ), approaching levels of egg laying observed from mated females



524 (62.1 ± 8.1) (mean eggs ± S.E.M, Fig 3C). In contrast, virgin gravid females injected  
525 with dMAG laid very few eggs (5.3 ± 4.2) not significantly different from saline injected  
526 controls (5.4 ± 5.0).

527

528 Our second assay series in the *LVPib12* strain similarly revealed a crude homogenate  
529 prepared from the terminal abdominal segment of virgin males (*Ae. aegypti* male  
530 abdominal tip: aeMAT) containing the accessory glands and all other male reproductive  
531 glands was sufficient to induce oviposition behavior when injected into the thorax of  
532 virgin gravid females. Females injected with only PBS solvent laid on average 4.2 ± 3.3  
533 eggs whereas those injected with aeMAT laid on average 60.7 ± 13.0 eggs (mean eggs  
534 ± S.E.M. aeMAT vs PBS control,  $p < 0.0001$ , Fig 3D). In contrast, dMAG did not  
535 stimulate egg laying from virgin gravid *Ae. aegypti* females (9.2 ± 8.6 eggs), yielding a  
536 similar level of oviposition to those injected with the PBS solvent control (mean eggs ±  
537 S.E.M., dMAG vs PBS control:  $p = 0.992$ , Fig 3D).

538

539 Finally, to probe whether *Drosophila* sex peptide (dSP) was capable of stimulating  
540 oviposition behavior in *Ae. aegypti*, we injected synthetic *D. melanogaster* sex peptide  
541 (dSP) over a concentration series ranging from 1.5 pmol to 150 pmol (Fig 3D) into virgin  
542 gravid females from the *LVPib12* strain. We determined that dSP injection did not have  
543 an effect on egg-laying in this context. The number of eggs (mean eggs ± S.E.M.) laid  
544 by females injected with 1.5 pmol dSP (0.3 ± 0.2, vs PBS control:  $p = 0.997$ ), 15 pmol  
545 dSP (15.3 ± 10.0, vs PBS control:  $p = 0.787$ ) and 150 pmol dSP (11.0 ± 6.7, vs PBS  
546 control:  $p = 0.961$ ) did not differ significantly relative to the PBS solvent control.

547

548 We conclude that intrathoracic injection of dMAG as well as synthetic dSP are  
549 insufficient to stimulate oviposition behavior in virgin gravid *Ae. aegypti* females.  
550 However, aeMAT and aeMAG is sufficient to stimulate oviposition behavior within this  
551 context.

552

## 553 **Discussion**

554 Elucidating the molecular pathways involved in establishing post-mating  
555 responses in *Ae. aegypti* from both males and females is important to our  
556 understanding of their reproductive biology and has implications for strategies for vector  
557 control. Here, we explored the role of SPR, a critical female receptor in some other  
558 insects, including the dipteran *D. melanogaster*, in mediating multiple post-mating  
559 responses. The primary *D. melanogaster* SPR ligand responsible for controlling  
560 reproductive outcomes is SP, a seminal peptide that is not found in insects outside  
561 *Drosophila* genus (TSUDA AND AIGAKI 2016; MCGEARY AND FINDLAY 2020). Interestingly,  
562 injecting *D. melanogaster* SP into unmated female *H. armigera* moths reduces egg  
563 laying, suppresses pheromone synthesis, and reduces calling behaviors (FAN *et al.*  
564 1999; FAN *et al.* 2000; HANIN *et al.* 2012), thus mimicking post-mating responses  
565 analogous to those induced by SP in *Drosophila*. However, roles of SPR, and effects of  
566 SP were not consistent across insects. For example, injection of SP<sup>21-36</sup> into the  
567 tarnished plant bug *Lygus herperus* had no effect on mating receptivity and although  
568 this region of SP binds *in vitro* to SPR from *D. melanogaster* and *H. armigera* it was  
569 unable to bind to SPR from *L. herperus* (HULL AND BRENT 2014). Although *Ae. aegypti*

570 oviposition was reported to be induced by surgical implantation of whole *D.*  
571 *melanogaster* accessory glands (LEAHY 1967) or intrathoracic injection of whole  
572 *Drosophila* male body lysates in the thorax of blood fed, virgin females (HISS AND FUCHS  
573 1972), it is not known what male molecule(s) had this effect nor what receptor they  
574 bound to in the female. It should be noted that the stimulation of oviposition with  
575 intrathoracic injection of *Drosophila* male accessory gland homogenate into gravid virgin  
576 *Ae. aegypti* females was not observed when independently tested by both groups. In  
577 contrast, we found that *Ae. aegypti* accessory gland homogenate preparations were  
578 fully sufficient to evoke the post-mating receptivity and egg laying phenotypes that we  
579 characterized in this study consistent with previous reports (HISS AND FUCHS 1972;  
580 HELINSKI *et al.* 2012).

581 Genes corresponding to a SP homolog are not readily identified in insects  
582 outside *Drosophila*, but sequences homologous to SPR can be identified in various  
583 insect groups, including *Ae. aegypti*.; the mosquito SPR even binds *Drosophila* SP *in*  
584 *vitro*, albeit weakly (KIM *et al.* 2010; LEE *et al.* 2020). Given the presence of SPR in *Ae.*  
585 *aegypti*, the parallels between post-mating responses in *Ae. aegypti* and *D.*  
586 *melanogaster*, and the importance of SP in inducing post-mating response in *H.*  
587 *armigera*, we tested here whether SPR is required for post-mating responses in *Ae.*  
588 *aegypti*. We generated two independent SPR null mutations by CRISPR/Cas9 gene  
589 editing and compared mutant and control females for a variety of post-mating  
590 responses.

591 First, we tested whether SPR is needed for the post-mating drop in female  
592 receptivity. Female *Ae. aegypti* that have mated are refractory to subsequent mating

593 (CRAIG 1967; HELINSKI *et al.* 2012); ~25% do not remate immediately after mating, and  
594 all the mosquitoes eventually establish strong refractoriness 16-20 h after the initial  
595 mating (DEGNER AND HARRINGTON 2016). In both of the *Spr* mutant alleles (*Spr*<sup>A235</sup> and  
596 *Spr*<sup>ECFP</sup>) that we characterized, functional knockout of SPR does not affect the  
597 establishment of remating refractoriness, regardless of the interval between mating  
598 opportunities.

599 Stimulation of egg development and oviposition is another post-mating response  
600 by *Ae. aegypti* females (LANG 1956; JUDSON 1967). *Spr*<sup>ECFP</sup> knockout females oviposited  
601 a similar number of eggs as heterozygous females after mating and blood feeding,  
602 demonstrating that SPR is not required for this post-mating process. Knockdown or  
603 knockout of SPR in various insect systems have noted a reduced number of eggs laid  
604 (LI *et al.* 2014; ZHENG *et al.* 2015; GREGORIOU AND MATHIOPOULOS 2020; LIU *et al.* 2021),  
605 although the degree of reduction varies and it often is not a complete lack of egg laying.  
606 Consistent with the lack of effect of SPR knockout on mating receptivity and on  
607 oviposition, no phenotypes were observed when two commercial sources of synthetic  
608 dSP (at a biologically-effective dose for *D. melanogaster*) were injected independently  
609 into unmated *Ae. aegypti* females. The lack of any observable impact of intrathoracic  
610 microinjection of synthetic sex peptide on *Ae. aegypti* egg laying thus mirrored that of  
611 injecting dMAG homogenate which had the effect as described above.

612 SPR was reported to bind myoinhibitory peptides (MIPs), often at stronger  
613 affinities than SP, leading to the hypothesis that SPR is an ancestral MIP receptor (KIM  
614 *et al.* 2010; POELS *et al.* 2010). MIPs in insects are involved in control of hindgut and  
615 oviduct muscle contraction (SCHOOFs *et al.* 1991; BLACKBURN *et al.* 1995; BLACKBURN *et*

616 *al.* 2001; PALUZZI *et al.* 2015; LUBAWY *et al.* 2020), modulating nutritional preferences  
617 (HUSSAIN *et al.* 2016; MIN *et al.* 2016), maintaining sleep states in *D. melanogaster* (OH  
618 *et al.* 2014), as well as involvement in ecdysis (DAVIS *et al.* 2003; KIM *et al.* 2006a; KIM  
619 *et al.* 2006b; SANTOS *et al.* 2007). MIPs have been shown to have allostatic activity by  
620 inhibiting JH synthesis in the cricket *Gryllus bimaculatus* (LORENZ *et al.* 1995) and  
621 Brown-winged green bug *Plautia stali* (MATSUMOTO *et al.* 2017). The *B. mori* peptide  
622 PTSP inhibits ecdysone synthesis from the prothoracic gland (HUA *et al.* 1999). There  
623 are five identified MIPs in *Ae. aegypti* (PREDEL *et al.* 2010; SIJU *et al.* 2014) with positive  
624 staining in the CNS with an anti-MIP antibody (KIM *et al.* 2010), though intriguingly a  
625 non-MIP ligand for *Ae. aegypti* SPR was partially purified (KIM *et al.* 2010). In our *in vitro*  
626 assay we found that *Ae. aegypti* SPR showed modest responses to Ast3, AT, sNPF1,  
627 sNPF 2+4, TKRP2, TKRP3 but we did not observe significant responses to HP-I, a  
628 peptide known to be found in male accessory gland and transferred to females during  
629 mating (NACCARATI *et al.* 2012; DUVALL *et al.* 2017) nor did we identify novel high  
630 efficacy ligands for SPR among our cohort of 50 peptides. Unlike Kim *et al.* (2010), we  
631 did not observe responses from MIP peptides tested in this assay (MIP 1, 4, and 5),  
632 although we note that our assay differs in cell type and sensor, and that although a  
633 10 $\mu$ M dose of peptide has been used successfully to identify ligand/receptor interactions  
634 (DUVALL *et al.* 2019) we acknowledge that a single dose of ligand may not be sufficient  
635 to identify all potential SPR agonists. Given no strong phenotype in the SPR knockout  
636 mosquitoes characterized in the assays presented here, it is still possible that there  
637 could be a subtle effect with other known functions of MIPs. It is also possible there are

638 pathways where ligands other than MIPs bind SPR that were not included in our peptide  
639 panel or belong to a different class of ligands.

640 As highlighted above, SPR disruptions in different insects can have varying  
641 effects on reproductive traits. Our contribution characterizing the effects of lack of SPR  
642 in *Ae. aegypti* helps contribute to the evolutionary understanding of this key receptor.  
643 The SPR is flexible to evolve binding to similar ligands for different functions, some of  
644 which have been used in reproduction. Unknown signaling pathways operating during  
645 transfer of *Ae. aegypti* seminal fluid thus likely underlie long-term refractoriness to  
646 remating and induction of egg laying in this important disease vector.

647

648 **Data availability statement:** Strains and plasmids are available upon request. The  
649 authors affirm that all data necessary for confirming the conclusions of the article are  
650 present within the article, figures, and tables.

651

## 652 **Acknowledgements**

653 We thank NIH grant R01-AI095491 to LCH and MFW, NIH grant R21AI176101 to CJM,  
654 and NIH grant R35-GM137888 and a Beckman Young Investigator award to LBD for  
655 supporting this research. MPW was supported by postdoctoral fellowships from the NIH  
656 (T32AI007417) and a 2022 L'Oreal USA For Women in Science Fellowship. ASP was  
657 supported by an NSF GRFP award. We thank Dr. Ben Matthews for advice on CRISPR  
658 strategies for generation of the *Spr*<sup>4235</sup> mutant allele at Cornell and assistance with  
659 sequence interpretation, the University of Maryland Insect Transformation Facility for  
660 injecting the constructs, Dr. Erika Mudrak of the Cornell Statistical Consulting Unit for

661 assistance with statistical analysis, Dr. Nilay Yapici for valuable discussions, and Dr.  
 662 Garrett League, Lindsay Baxter, Elizabeth Martin, Jake Angelico, Natalie Bailey, Brady  
 663 Dolan, Nicole Blattman, and Sean Lee for mosquito rearing and data collection  
 664 assistance at Cornell. CJM thanks Bloomberg Philanthropies and Johns Hopkins  
 665 Malaria Research Institute for generous supplemental funding and supporting  
 666 infrastructure.

667

668 **Table S1. Primers for generation and verification of the *Spr*<sup>4235</sup> NHEJ allele**

669 Underlined sequences in guide primers are complementary to the universal primer for  
 670 use in template-free PCR to generate the DNA template for guide RNA synthesis.

671 Bolded bases indicate the targeted *Spr* gene sequence.

|                                         | Sequence (5' – 3')                                                                                                   |
|-----------------------------------------|----------------------------------------------------------------------------------------------------------------------|
| gRNA universal<br>reverse; Kistler 2015 | AAA AGC ACC GAC TCG GTG CCA CTT TTT CAA GTT GAT AAC GGA CTA<br>GCC TTA TTT TAA CTT <u>GCT ATT TCT AGC TCT AAA AC</u> |
| Guide 1                                 | GAA ATT AAT ACG ACT CAC TAT AGG <b>TAG ATG CCA GGA TCC AGT GGT</b><br><u>TTT AGA GCT AGA AAT AGC</u>                 |
| Guide 2                                 | GAA ATT AAT ACG ACT CAC TAT AGG <b>CGA TAT CTC TAA TGT CCT GTT TTA</b><br><u>GAG CTA GAA ATA GC</u>                  |
| SPR genotyping<br>Forward               | TCG TCT CAC AGC TAG AAT TGC                                                                                          |
| SPR genotyping<br>Reverse               | CAT CAG CAC GAA GTT GGT CG                                                                                           |

672

673 **Table S2. Primers for generation and verification of the *Spr*<sup>ECFP</sup> HDR allele**  
 674 Underlined sequences indicate adapters for InFusion cloning, bold sequence indicates  
 675 *LoxP* sites incorporated into the cassette to facilitate potential *Cre-LoxP* mediated  
 676 excision of the integrated marker cassette, and lowercase letters indicate a triple stop  
 677 cassette sequence.

|                                                         | Sequence (5' – 3')                                                                                                             |
|---------------------------------------------------------|--------------------------------------------------------------------------------------------------------------------------------|
| guideRNA for SPR<br>exon 2                              | AAC AGC GGA GAC GCC TCA AG                                                                                                     |
| Forward Left Homology<br>Arm (5' Sall)                  | <u>AAT GGC CAT GGG ACG TCG ACC</u> GTC TTT CGG AGA CAT CGG CA                                                                  |
| Reverse Left homology<br>arm (5' Sall)                  | <u>TTA CCT CAG GTC GAC ATA ACT TCG TAT AAT GTA TGC TAT ACG</u><br><b>AAG TTA</b> Ttc agc cta cgt taC TTG AGG CGT CTC CGC TGT T |
| Forward Right<br>homology arm (5' AgeI)                 | <u>ATA GTT CTA GAG GTA CCG GTA TAA CTT CGT ATA GCA TAC ATT</u><br><b>ATA CGA AGT TAT</b> TGG TGG CGA ACG AAT GCT GTA           |
| Reverse right homology<br>arm (5' AgeI)                 | <u>GGC TAA CGT TAA CAA CCG GTC</u> AAA CTG TGG TTC ACT CGA ACC G                                                               |
| gBlock Forward                                          | <u>GGC CTA GGA TGC ATA</u> GAA TGA AAT CGC CCA TCG                                                                             |
| gBlock Reverse                                          | <u>CAG GCG GCC GCC ATA</u> AAA AAA GCA CCG ACT CGG                                                                             |
| SPR insertion<br>genotyping forward;<br>cut site        | CGC CTC AAG TGG TGG C                                                                                                          |
| SPR insertion<br>genotyping forward;<br>polyUb cassette | GCT TTC TTT CTT GTC TGG CTC                                                                                                    |



|                                                            |                            |
|------------------------------------------------------------|----------------------------|
| SPR insertion<br>genotyping reverse;<br>right homology arm | GTT TCA CAG GAC ACG TTC AG |
|------------------------------------------------------------|----------------------------|

678

## 679 **References**

680

681 Alfonso-Parra, C., Y. H. Ahmed-Braimah, E. C. Degner, F. W. Avila, S. M. Villarreal *et al.*, 2016  
682 Mating-Induced Transcriptome Changes in the Reproductive Tract of Female *Aedes*  
683 *aegypti*. PLoS Negl Trop Dis 10: e0004451.

684 Amaro, I. A., Y. H. Ahmed-Braimah, G. P. League, S. A. Pitcher, F. W. Avila *et al.*, 2021 Seminal  
685 fluid proteins induce transcriptome changes in the *Aedes aegypti* female lower  
686 reproductive tract. BMC Genomics 22: 896.

687 Avila, F. W., A. L. Mattei and M. F. Wolfner, 2015 Sex peptide receptor is required for the  
688 release of stored sperm by mated *Drosophila melanogaster* females. J Insect Physiol 76:  
689 1-6.

690 Avila, F. W., L. K. Sirot, B. A. LaFlamme, C. D. Rubinstein and M. F. Wolfner, 2011 Insect seminal  
691 fluid proteins: identification and function. Annu Rev Entomol 56: 21-40.

692 Blackburn, M. B., H. Jaffe, J. Kochansky and A. K. Raina, 2001 Identification of four additional  
693 myoinhibitory peptides (MIPs) from the ventral nerve cord of *Manduca sexta*. Arch  
694 Insect Biochem Physiol 48: 121-128.

695 Blackburn, M. B., R. M. Wagner, J. P. Kochansky, D. J. Harrison, P. Thomas-Laemont *et al.*, 1995  
696 The identification of two myoinhibitory peptides, with sequence similarities to the  
697 galanins, isolated from the ventral nerve cord of *Manduca sexta*. Regul Pept 57: 213-  
698 219.

699 Cator, L. J., C. A. S. Wyer and L. C. Harrington, 2021 Mosquito Sexual Selection and  
700 Reproductive Control Programs. Trends Parasitol 37: 330-339.

701 Chapman, T., J. Bangham, G. Vinti, B. Seifried, O. Lung *et al.*, 2003 The sex peptide of *Drosophila*  
702 *melanogaster*: female post-mating responses analyzed by using RNA interference. Proc  
703 Natl Acad Sci U S A 100: 9923-9928.

704 Chen, H., H. Sun, J. Xie, Z. Yao, W. Zheng *et al.*, 2023 CRISPR/Cas9-induced Mutation of Sex  
705 Peptide Receptor Gene *Bdspr* Affects Ovary, Egg Laying, and Female Fecundity in  
706 *Bactrocera dorsalis* (*Hendel*) (Diptera: Tephritidae). J Insect Sci 23.

707 Chen, J., J. Luo, Y. Wang, A. S. Gurav, M. Li *et al.*, 2021 Suppression of female fertility in *Aedes*  
708 *aegypti* with a CRISPR-targeted male-sterile mutation. Proc Natl Acad Sci U S A 118.

709 Chen, P. S., E. Stumm-Zollinger, T. Aigaki, J. Balmer, M. Bienz *et al.*, 1988 A male accessory gland  
710 peptide that regulates reproductive behavior of female *D. melanogaster*. Cell 54: 291-  
711 298.

712 Chen, T.-W., T. J. Wardill, Y. Sun, S. R. Pulver, S. L. Renninger *et al.*, 2013 Ultrasensitive  
713 fluorescent proteins for imaging neuronal activity. Nature 499: 295-300.

- 714 Civetta, A., and R. S. Singh, 1998 Sex-related genes, directional sexual selection, and speciation.  
715 Mol Biol Evol 15: 901-909.
- 716 Craig, G. B., Jr., 1967 Mosquitoes: female monogamy induced by male accessory gland  
717 substance. Science 156: 1499-1501.
- 718 Davis, N. T., M. B. Blackburn, E. G. Golubeva and J. G. Hildebrand, 2003 Localization of  
719 myoinhibitory peptide immunoreactivity in *Manduca sexta* and *Bombyx mori*, with  
720 indications that the peptide has a role in molting and ecdysis. J Exp Biol 206: 1449-1460.
- 721 Degner, E. C., and L. C. Harrington, 2016 Polyandry Depends on Postmating Time Interval in the  
722 Dengue Vector *Aedes aegypti*. Am J Trop Med Hyg 94: 780-785.
- 723 Duvall, L. B., N. S. Basrur, H. Molina, C. J. McMeniman and L. B. Vosshall, 2017 A Peptide  
724 Signaling System that Rapidly Enforces Paternity in the *Aedes aegypti* Mosquito. Curr  
725 Biol 27: 3734-3742 e3735.
- 726 Duvall, L. B., L. Ramos-Espiritu, K. E. Barsoum, J. F. Glickman and L. B. Vosshall, 2019 Small-  
727 Molecule Agonists of *Ae. aegypti* Neuropeptide Y Receptor Block Mosquito Biting. Cell  
728 176: 687-701 e685.
- 729 Fan, Y., A. Rafaeli, C. Gileadi, E. Kubli and S. W. Applebaum, 1999 *Drosophila melanogaster* sex  
730 peptide stimulates juvenile hormone synthesis and depresses sex pheromone  
731 production in *Helicoverpa armigera*. J Insect Physiol 45: 127-133.
- 732 Fan, Y., A. Rafaeli, P. Moshitzky, E. Kubli, Y. Choffat *et al.*, 2000 Common functional elements of  
733 *Drosophila melanogaster* seminal peptides involved in reproduction of *Drosophila*  
734 *melanogaster* and *Helicoverpa armigera* females. Insect Biochem Mol Biol 30: 805-812.
- 735 Faul, F., E. Erdfelder, A. G. Lang and A. Buchner, 2007 G\*Power 3: a flexible statistical power  
736 analysis program for the social, behavioral, and biomedical sciences. Behav Res Methods  
737 39: 175-191.
- 738 Feng, K., M. T. Palfreyman, M. Hasemeyer, A. Talsma and B. J. Dickson, 2014 Ascending SAG  
739 neurons control sexual receptivity of *Drosophila* females. Neuron 83: 135-148.
- 740 Garbe, D. S., A. S. Vigderman, E. Moscato, A. E. Dove, C. G. Vecsey *et al.*, 2016 Changes in  
741 Female *Drosophila* Sleep following Mating Are Mediated by SPSN-SAG Neurons. J Biol  
742 Rhythms 31: 551-567.
- 743 Gregoriou, M. E., and K. D. Mathiopoulos, 2020 Knocking down the sex peptide receptor by  
744 dsRNA feeding results in reduced oviposition rate in olive fruit flies. Arch Insect Biochem  
745 Physiol 104: e21665.
- 746 Haerty, W., S. Jagadeeshan, R. J. Kulathinal, A. Wong, K. Ravi Ram *et al.*, 2007 Evolution in the  
747 fast lane: rapidly evolving sex-related genes in *Drosophila*. Genetics 177: 1321-1335.
- 748 Hanin, O., A. Azrielli, S. W. Applebaum and A. Rafaeli, 2012 Functional impact of silencing the  
749 *Helicoverpa armigera* sex-peptide receptor on female reproductive behaviour. Insect  
750 Mol Biol 21: 161-167.
- 751 Hasemeyer, M., N. Yapici, U. Heberlein and B. J. Dickson, 2009 Sensory neurons in the  
752 *Drosophila* genital tract regulate female reproductive behavior. Neuron 61: 511-518.
- 753 Hayes, R. O., 1953 Determination of a Physiological Saline Solution for *Aedes aegypti* (L.).  
754 Journal of Economic Entomology 46: 624-627.
- 755 Helinski, M. E., P. Deewatthanawong, L. K. Sirot, M. F. Wolfner and L. C. Harrington, 2012  
756 Duration and dose-dependency of female sexual receptivity responses to seminal fluid  
757 proteins in *Aedes albopictus* and *Ae. aegypti* mosquitoes. J Insect Physiol 58: 1307-1313.

- 758 Helinski, M. E., and L. C. Harrington, 2011 Male mating history and body size influence female  
759 fecundity and longevity of the dengue vector *Aedes aegypti*. *J Med Entomol* 48: 202-  
760 211.
- 761 Hiss, E. A., and M. S. Fuchs, 1972 The effect of matrone on oviposition in the mosquito, *Aedes*  
762 *Aegypti*. *J Insect Physiol* 18: 2217-2227.
- 763 Hua, Y. J., Y. Tanaka, K. Nakamura, M. Sakakibara, S. Nagata *et al.*, 1999 Identification of a  
764 prothoracicostatic peptide in the larval brain of the silkworm, *Bombyx mori*. *J Biol Chem*  
765 274: 31169-31173.
- 766 Hull, J. J., and C. S. Brent, 2014 Identification and characterization of a sex peptide receptor-like  
767 transcript from the western tarnished plant bug *Lygus hesperus*. *Insect Mol Biol* 23: 301-  
768 319.
- 769 Hussain, A., H. K. Ucpunar, M. Zhang, L. F. Loschek and I. C. Grunwald Kadow, 2016  
770 Neuropeptides Modulate Female Chemosensory Processing upon Mating in *Drosophila*.  
771 *PLoS Biol* 14: e1002455.
- 772 Judson, C. L., 1967 Feeding and oviposition behavior in the mosquito *Aedes aegypti* (L.). I.  
773 Preliminary studies of physiological control mechanisms. *Biol Bull* 133: 369-378.
- 774 Kim, Y. J., K. Bartalska, N. Audsley, N. Yamanaka, N. Yapici *et al.*, 2010 MIPs are ancestral ligands  
775 for the sex peptide receptor. *Proc Natl Acad Sci U S A* 107: 6520-6525.
- 776 Kim, Y. J., D. Zitnan, K. H. Cho, D. A. Schooley, A. Mizoguchi *et al.*, 2006a Central peptidergic  
777 ensembles associated with organization of an innate behavior. *Proc Natl Acad Sci U S A*  
778 103: 14211-14216.
- 779 Kim, Y. J., D. Zitnan, C. G. Galizia, K. H. Cho and M. E. Adams, 2006b A command chemical  
780 triggers an innate behavior by sequential activation of multiple peptidergic ensembles.  
781 *Curr Biol* 16: 1395-1407.
- 782 Kistler, K. E., L. B. Vosshall and B. J. Matthews, 2015 Genome engineering with CRISPR-Cas9 in  
783 the mosquito *Aedes aegypti*. *Cell Rep* 11: 51-60.
- 784 Labun, K., T. G. Montague, J. A. Gagnon, S. B. Thyme and E. Valen, 2016 CHOPCHOP v2: a web  
785 tool for the next generation of CRISPR genome engineering. *Nucleic Acids Res* 44: W272-  
786 276.
- 787 Lang, C. A., 1956 The influence of mating on egg production by *Aedes aegypti*. *Am J Trop Med*  
788 *Hyg* 5: 909-914.
- 789 Leahy, M. G., 1967 Non-specificity of the male factor enhancing egg-laying in Diptera. *Journal of*  
790 *Insect Physiology* 13: 1283-1292.
- 791 Leahy, M. G., and G. B. Craig, Jr., 1965 Accessory gland substance as a stimulant for oviposition  
792 in *Aedes aegypti* and *A. albopictus*. *Mosquito News* 25: 448-452.
- 793 Lee, J. H., N. R. Lee, D. H. Kim and Y. J. Kim, 2020 Molecular characterization of ligand selectivity  
794 of the sex peptide receptors of *Drosophila melanogaster* and *Aedes aegypti*. *Insect*  
795 *Biochem Mol Biol* 127: 103472.
- 796 Li, C., J.-F. Yu, Q. Lu, J. Xu, J.-H. Liu *et al.*, 2014 Molecular characterization and functional  
797 analysis of a putative sex-peptide receptor in the tobacco cutworm *Spodoptera*  
798 *litura*(Fabricius, 1775) (Lepidoptera: Noctuidae). *Austral Entomology* 53: 424-431.
- 799 Li, M., M. Bui, T. Yang, C. S. Bowman, B. J. White *et al.*, 2017 Germline Cas9 expression yields  
800 highly efficient genome engineering in a major worldwide disease vector, *Aedes aegypti*.  
801 *Proc Natl Acad Sci U S A* 114: E10540-E10549.

- 802 Liu, H., and E. Kubli, 2003 Sex-peptide is the molecular basis of the sperm effect in *Drosophila*  
803 *melanogaster*. Proc Natl Acad Sci U S A 100: 9929-9933.
- 804 Liu, S., B. Li, W. Liu, Y. Liu, B. Ren *et al.*, 2021 Sex peptide receptor mediates the post-mating  
805 switch in *Helicoverpa armigera* (Lepidoptera: Noctuidae) female reproductive behavior.  
806 Pest Manag Sci 77: 3427-3435.
- 807 Lorenz, M. W., R. Kellner and K. H. Hoffmann, 1995 A family of neuropeptides that inhibit  
808 juvenile hormone biosynthesis in the cricket, *Gryllus bimaculatus*. J Biol Chem 270:  
809 21103-21108.
- 810 Lubawy, J., P. Marciniak and G. Rosinski, 2020 Identification, Localization in the Central Nervous  
811 System and Novel Myostimulatory Effect of Allatostatins in *Tenebrio molitor* Beetle. Int J  
812 Mol Sci 21.
- 813 Matsumoto, K., Y. Suetsugu, Y. Tanaka, T. Kotaki, S. G. Goto *et al.*, 2017 Identification of  
814 allatostatins in the brown-winged green bug *Plautia stali*. J Insect Physiol 96: 21-28.
- 815 Matthews, B. J., C. S. McBride, M. DeGennaro, O. Despo and L. B. Vosshall, 2016 The  
816 neurotranscriptome of the *Aedes aegypti* mosquito. BMC Genomics 17: 32.
- 817 McGeary, M. K., and G. D. Findlay, 2020 Molecular evolution of the sex peptide network in  
818 *Drosophila*. J Evol Biol 33: 629-641.
- 819 McMeniman, C. J., R. A. Corfas, B. J. Matthews, S. A. Ritchie and L. B. Vosshall, 2014 Multimodal  
820 integration of carbon dioxide and other sensory cues drives mosquito attraction to  
821 humans. Cell 156: 1060-1071.
- 822 Min, S., H. S. Chae, Y. H. Jang, S. Choi, S. Lee *et al.*, 2016 Identification of a Peptidergic Pathway  
823 Critical to Satiety Responses in *Drosophila*. Curr Biol 26: 814-820.
- 824 Naccarati, C., N. Audsley, J. N. Keen, J. H. Kim, G. J. Howell *et al.*, 2012 The host-seeking  
825 inhibitory peptide, Aea-HP-1, is made in the male accessory gland and transferred to the  
826 female during copulation. Peptides 34: 150-157.
- 827 Nasci, R. S., 1990 Relationship of wing length to adult dry weight in several mosquito species  
828 (Diptera: Culicidae). J Med Entomol 27: 716-719.
- 829 Nene, V., J. R. Wortman, D. Lawson, B. Haas, C. Kodira *et al.*, 2007 Genome sequence of *Aedes*  
830 *aegypti*, a major arbovirus vector. Science 316: 1718-1723.
- 831 Offermanns, S., and M. I. Simon, 1995 Gα15 and Gα16 Couple a Wide Variety of Receptors to  
832 Phospholipase C (\*). Journal of Biological Chemistry 270: 15175-15180.
- 833 Oh, Y., S. E. Yoon, Q. Zhang, H. S. Chae, I. Daubnerova *et al.*, 2014 A homeostatic sleep-  
834 stabilizing pathway in *Drosophila* composed of the sex peptide receptor and its ligand,  
835 the myoinhibitory peptide. PLoS Biol 12: e1001974.
- 836 Okamoto, N., and A. Watanabe, 2022 Interorgan communication through peripherally derived  
837 peptide hormones in *Drosophila*. Fly (Austin) 16: 152-176.
- 838 Paluzzi, J. P., A. S. Haddad, L. Sedra, I. Orchard and A. B. Lange, 2015 Functional characterization  
839 and expression analysis of the myoinhibiting peptide receptor in the Chagas disease  
840 vector, *Rhodnius prolixus*. Mol Cell Endocrinol 399: 143-153.
- 841 Poels, J., T. Van Loy, H. P. Vandersmissen, B. Van Hiel, S. Van Soest *et al.*, 2010 Myoinhibiting  
842 peptides are the ancestral ligands of the promiscuous *Drosophila* sex peptide receptor.  
843 Cell Mol Life Sci 67: 3511-3522.
- 844 Predel, R., S. Neupert, S. F. Garczynski, J. W. Crim, M. R. Brown *et al.*, 2010 Neuropeptidomics of  
845 the mosquito *Aedes aegypti*. J Proteome Res 9: 2006-2015.

- 846 Santos, J. G., M. Vomel, R. Struck, U. Homberg, D. R. Nassel *et al.*, 2007 Neuroarchitecture of  
847 peptidergic systems in the larval ventral ganglion of *Drosophila melanogaster*. PLoS One  
848 2: e695.
- 849 Scheunemann, L., A. Lampin-Saint-Amaux, J. Schor and T. Preat, 2019 A sperm peptide  
850 enhances long-term memory in female *Drosophila*. Sci Adv 5: eaax3432.
- 851 Schmidt, T., Y. Choffat, S. Klauser and E. Kubli, 1993 The *Drosophila melanogaster* sex-peptide:  
852 A molecular analysis of structure-function relationships. Journal of Insect Physiology 39:  
853 361-368.
- 854 Schoofs, L., G. M. Holman, T. K. Hayes, R. J. Nachman and A. De Loof, 1991 Isolation, primary  
855 structure, and synthesis of locustapyrokinin: a myotropic peptide of *Locusta migratoria*.  
856 Gen Comp Endocrinol 81: 97-104.
- 857 Siju, K. P., A. Reifenrath, H. Scheiblich, S. Neupert, R. Predel *et al.*, 2014 Neuropeptides in the  
858 antennal lobe of the yellow fever mosquito, *Aedes aegypti*. J Comp Neurol 522: 592-608.
- 859 Smith, L. B., S. Kasai and J. G. Scott, 2018 Voltage-sensitive sodium channel mutations S989P +  
860 V1016G in *Aedes aegypti* confer variable resistance to pyrethroids, DDT and oxadiazines.  
861 Pest Manag Sci 74: 737-745.
- 862 Smith, R. C., M. F. Walter, R. H. Hice, D. A. O'Brochta and P. W. Atkinson, 2007 Testis-specific  
863 expression of the beta2 tubulin promoter of *Aedes aegypti* and its application as a  
864 genetic sex-separation marker. Insect Mol Biol 16: 61-71.
- 865 Swanson, W. J., and V. D. Vacquier, 2002 The rapid evolution of reproductive proteins. Nat Rev  
866 Genet 3: 137-144.
- 867 Tsuda, M., and T. Aigaki, 2016 Evolution of sex-peptide in *Drosophila*. Fly (Austin) 10: 172-177.
- 868 Tsuda, M., J. B. Peyre, T. Asano and T. Aigaki, 2015 Visualizing Molecular Functions and Cross-  
869 Species Activity of Sex-Peptide in *Drosophila*. Genetics 200: 1161-1169.
- 870 Villarreal, S. M., S. Pitcher, M. E. H. Helinski, L. Johnson, M. F. Wolfner *et al.*, 2018 Male  
871 contributions during mating increase female survival in the disease vector mosquito  
872 *Aedes aegypti*. J Insect Physiol 108: 1-9.
- 873 Wang, F., K. Wang, N. Forknall, C. Patrick, T. Yang *et al.*, 2020 Neural circuitry linking mating and  
874 egg laying in *Drosophila* females. Nature 579: 101-105.
- 875 Wang, K., F. Wang, N. Forknall, T. Yang, C. Patrick *et al.*, 2021 Neural circuit mechanisms of  
876 sexual receptivity in *Drosophila* females. Nature 589: 577-581.
- 877 White, M. A., A. Bonfini, M. F. Wolfner and N. Buchon, 2021 *Drosophila melanogaster* sex  
878 peptide regulates mated female midgut morphology and physiology. Proc Natl Acad Sci  
879 U S A 118.
- 880 Wigby, S., N. C. Brown, S. E. Allen, S. Misra, J. L. Sitnik *et al.*, 2020 The *Drosophila* seminal  
881 proteome and its role in postcopulatory sexual selection. Philos Trans R Soc Lond B Biol  
882 Sci 375: 20200072.
- 883 Wohl, M. P., and C. J. McMeniman, 2023a Batch Rearing *Aedes aegypti*. Cold Spring Harb Protoc  
884 2023: pdb prot108017.
- 885 Wohl, M. P., and C. J. McMeniman, 2023b Single-Pair and Small-Group Crosses of *Aedes*  
886 *aegypti*. Cold Spring Harb Protoc 2023: pdb prot108018.
- 887 Yang, C. H., S. Rumpf, Y. Xiang, M. D. Gordon, W. Song *et al.*, 2009 Control of the postmating  
888 behavioral switch in *Drosophila* females by internal sensory neurons. Neuron 61: 519-  
889 526.

- 890 Yapici, N., Y. J. Kim, C. Ribeiro and B. J. Dickson, 2008 A receptor that mediates the post-mating  
891 switch in *Drosophila* reproductive behaviour. *Nature* 451: 33-37.
- 892 Zheng, W., Y. Liu, W. Zheng, Y. Xiao and H. Zhang, 2015 Influence of the silencing sex-peptide  
893 receptor on *Bactrocera dorsalis* adults and offspring by feeding with ds-spr. *Journal of*  
894 *Asia-Pacific Entomology* 18: 477-481.

**A** *Spr*<sup>+</sup>

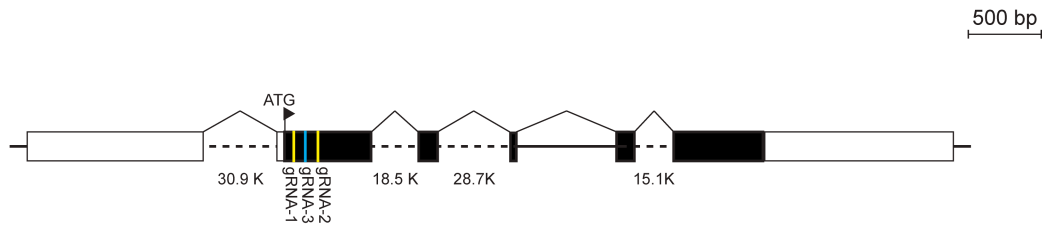

**B** *Spr*<sup>Δ235</sup>

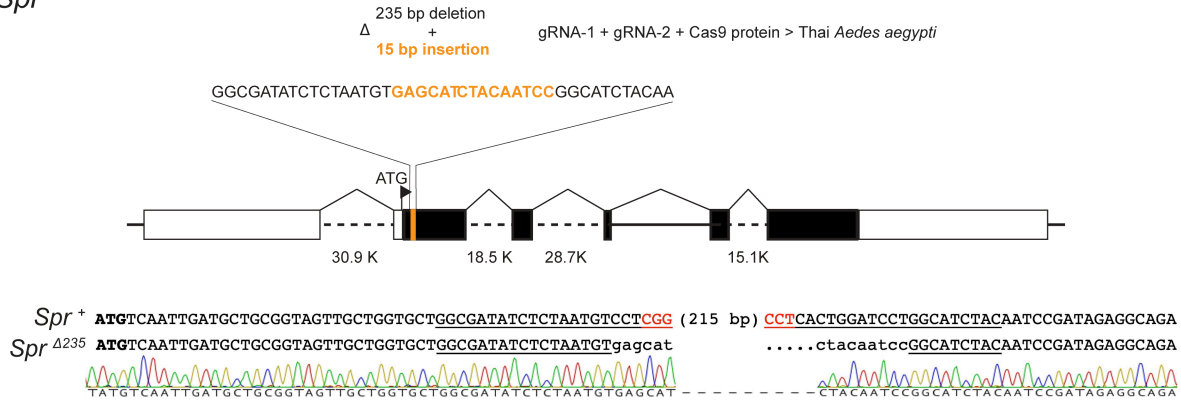

**C** *Spr*<sup>ECFP</sup>

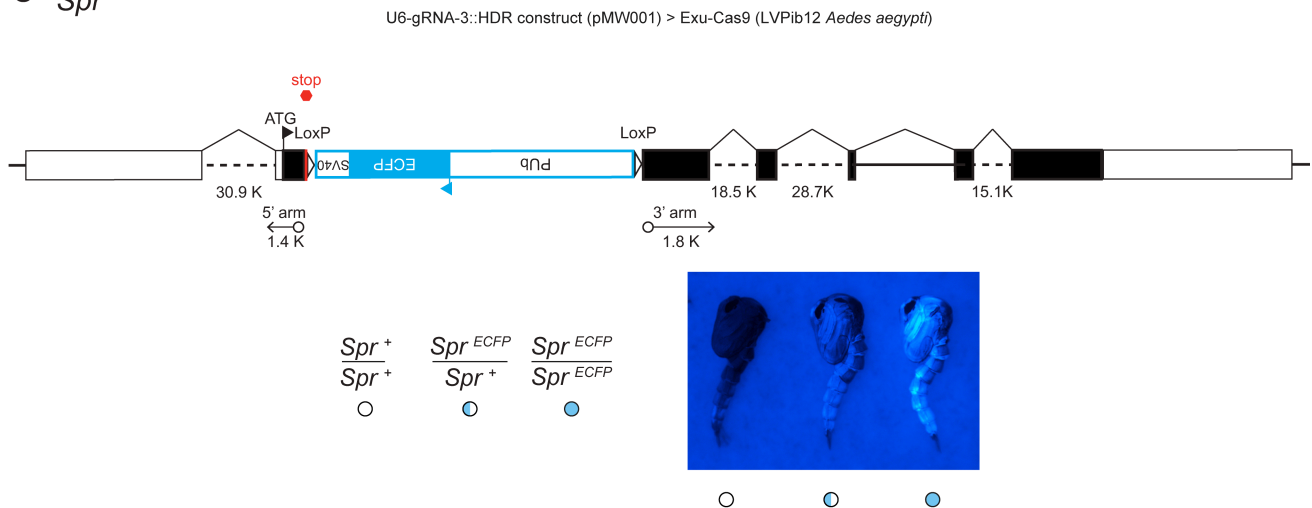

**D**

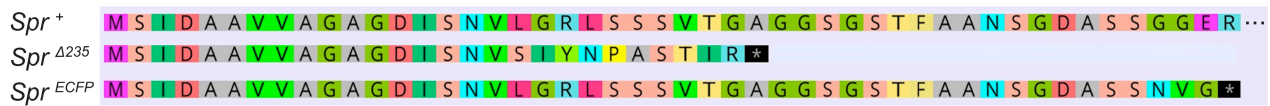

**Figure 1: Generation of *Aedes aegypti* sex peptide receptor mutants.**

(A) Diagram of the wild type *Ae. aegypti* sex peptide receptor (*Spr*<sup>+</sup>) genomic locus. Boxes denote exons which are shaded with white for untranslated regions and black for the open reading frame. Guide RNA sites used for generating mutants shown as yellow and blue lines. (B) Diagram of the *Spr*<sup>Δ235</sup> mutant allele generated by deletion of 235 bp and insertion of 15 bp using gRNA1 and gRNA2. Sanger trace (below) validates the altered sequence of this allele relative to wild type. Translational start site is bold, gRNA target site underlined, and PAM sequence highlighted in red. (C) Diagram of *Spr*<sup>ECFP</sup> mutant allele generated by insertion of a disruptive ECFP expression cassette via homology directed repair. Representative images of wild type (open circle), heterozygous (half cyan circle) and homozygous (full cyan circle) *Spr*<sup>ECFP</sup> mutant pupae are shown below. (D) Predicted amino acid alignments of wild type and truncated *Spr*<sup>Δ235</sup> and *Spr*<sup>ECFP</sup> mutant alleles. Premature stop codons are indicated by the black box with star.

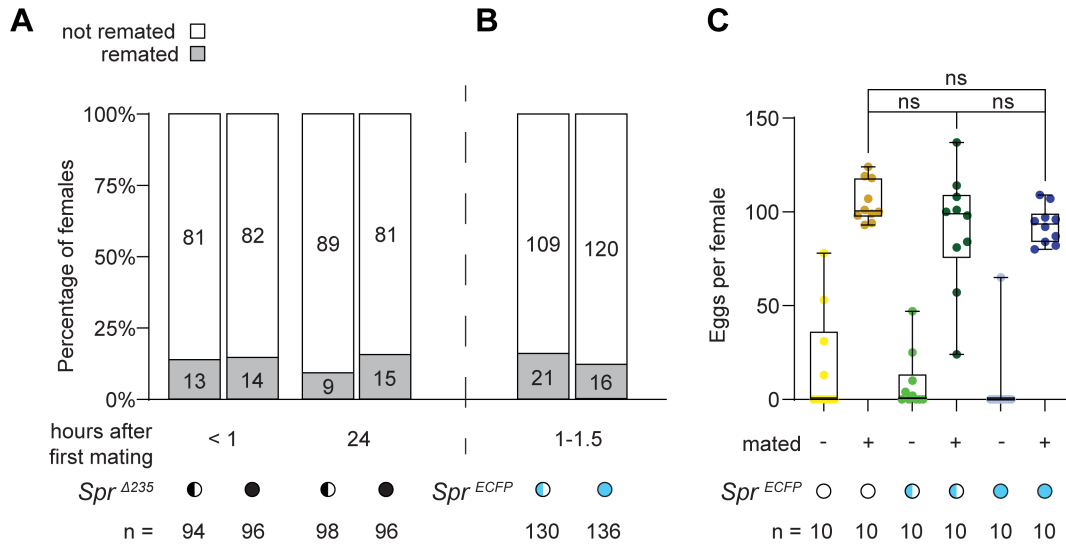

**Figure 2: Sex peptide receptor is not required for refractoriness to remating over varied timescales or induction of egg laying in *Aedes aegypti*.**

(A) Percent of *Spr*<sup>Δ235</sup> heterozygous (half black circle) and homozygous mutant (full black circle) females that remated (gray shading) immediately (<1 hr) or 24 h after their first mating. Raw number of females in each remating category are denoted within each bar. Cumulative sample size (n) from two independent biological replicates indicated. (B) Percent of *Spr*<sup>ECFP</sup> heterozygous (half cyan circle) and homozygous mutant (full cyan circle) females that remated (gray shading) 1 to 1.5 h after their first mating. Raw number of females in each remating category are denoted within each bar. Sample size indicated below genotypes. (C) Eggs laid per female for wild type (open circle), *Spr*<sup>ECFP</sup> heterozygous (half cyan circle) and *Spr*<sup>ECFP</sup> homozygous mutant (full cyan circle) mutant genotypes after a bloodmeal that were either virgin (-) or mated (+). n.s. = p > .05 (Dunnett's multiple comparisons test). Box plots show median, interquartile range, and maximum and minimum values.



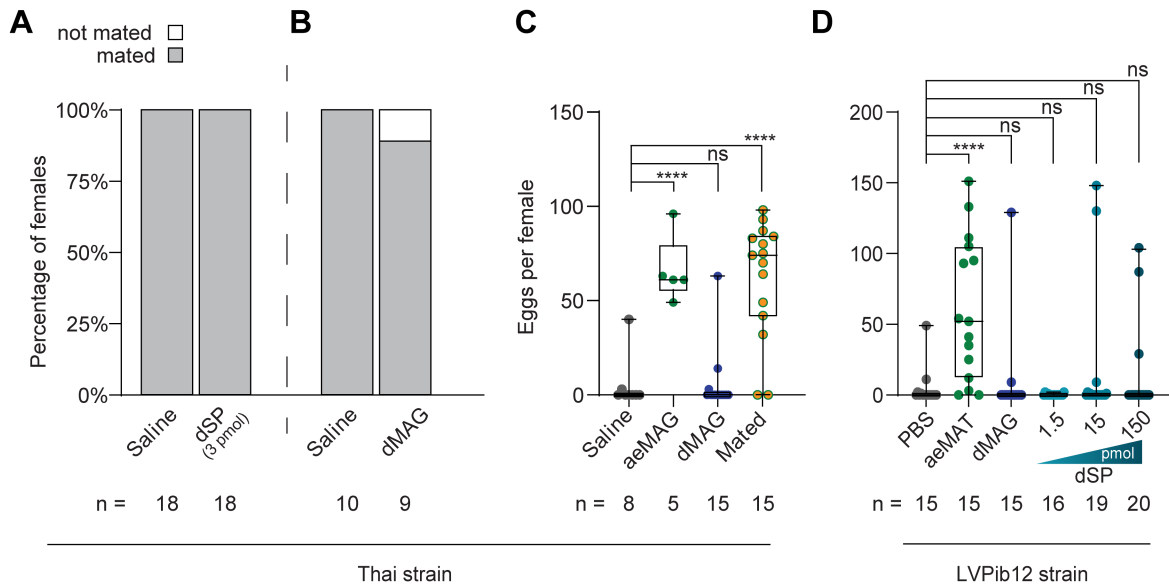

**Figure 3: *Drosophila melanogaster* sex peptide and accessory gland extracts do not induce post mating behaviors in *Aedes aegypti* females.**

(A) Percentage of virgin *Ae. aegypti* females injected with saline vehicle or synthetic *Drosophila* sex peptide (dSP) that mated (gray shading). (B) Percentage of virgin *Ae. aegypti* females injected with saline vehicle or *Drosophila* male accessory gland (dMAG) homogenate that mated (gray shading). (C) Eggs laid per virgin gravid *Ae. aegypti* female after injection with saline vehicle or male accessory gland homogenate from *Aedes aegypti* (aeMAG) or *Drosophila melanogaster* (dMAG), or normal mating. n.s. =  $p > .05$ , \*\*\*\*  $p < .0001$  (Dunnett's multiple comparisons test). (D) Eggs laid per virgin gravid *Ae. aegypti* female after injection with saline vehicle (PBS), male abdominal tip homogenate from *Aedes aegypti* (aeMAT), dMAG, or different dosages of dSP. n.s. =  $p > .05$ , \*\*\*\*  $p < .0001$  (Dunnett's multiple comparisons test). Box plots show median, interquartile range, and maximum and minimum values.

**A**

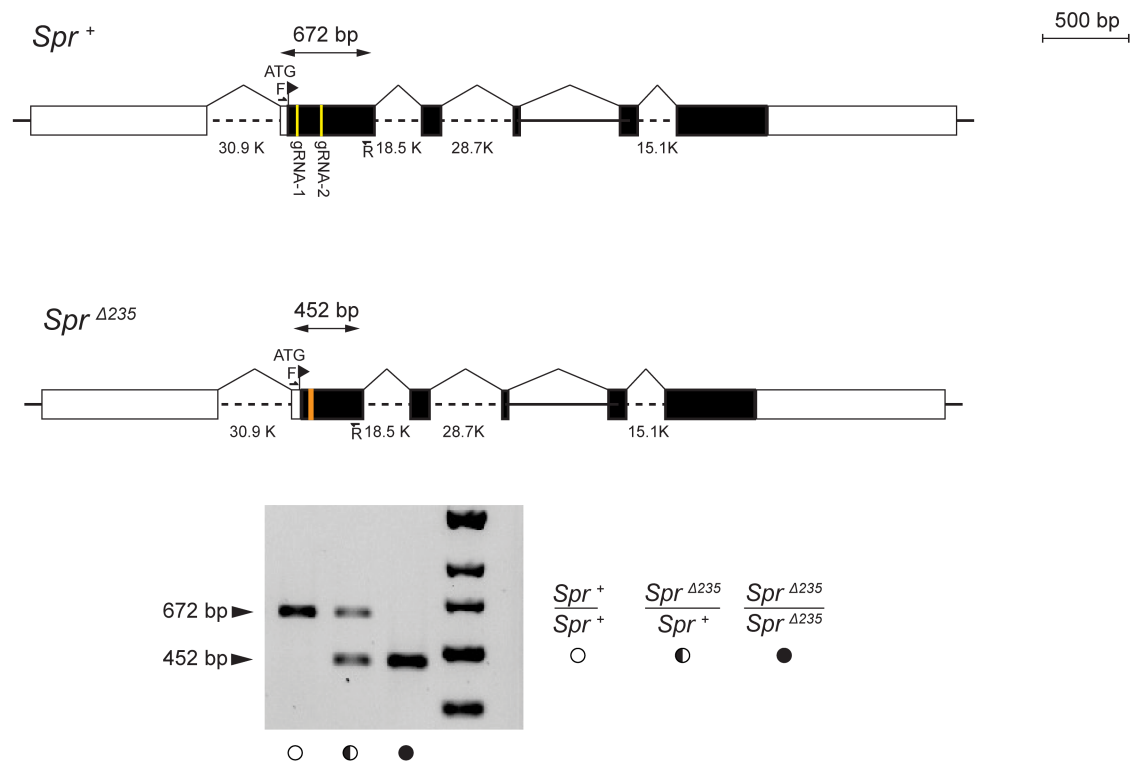

**B**

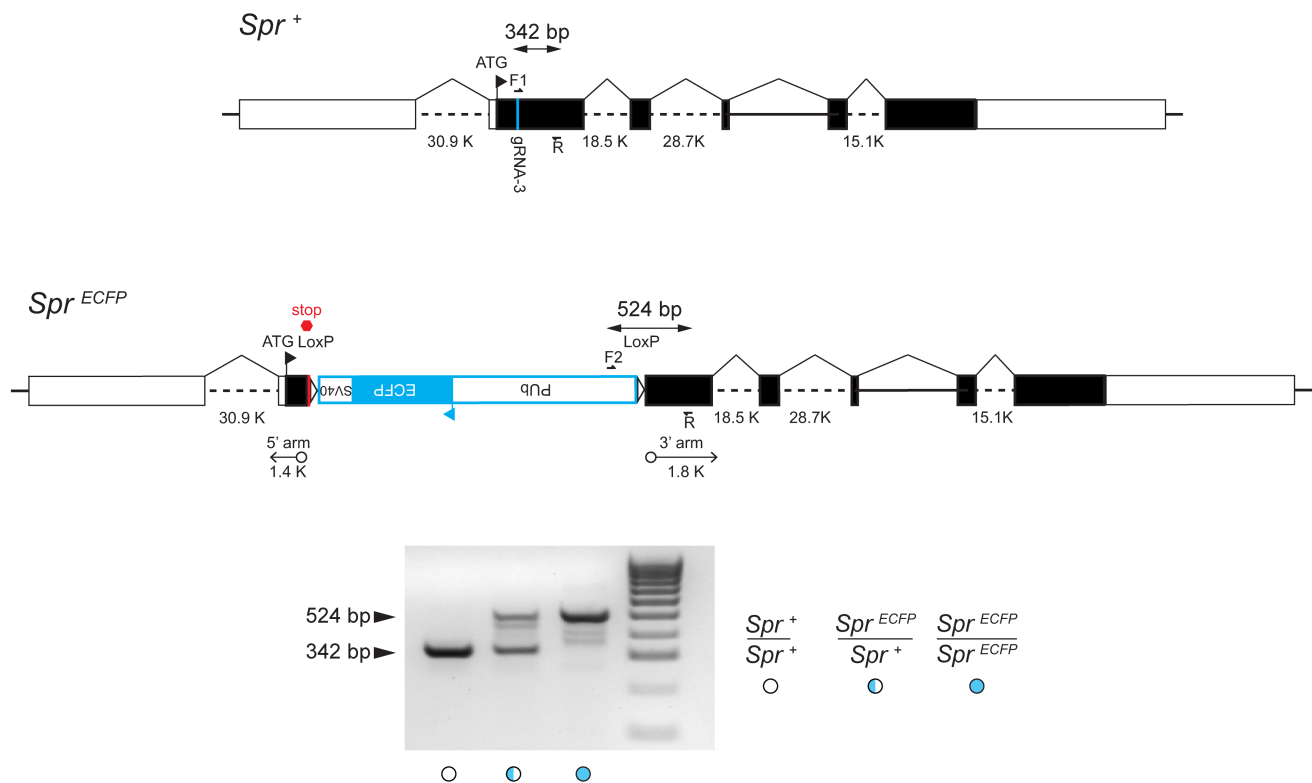

**Figure S1: PCR genotyping assays for *Aedes aegypti* sex peptide receptor mutant alleles.**

(A) Genotyping assay for the *Spr*<sup>Δ235</sup> NHEJ allele: a two primer PCR assay with forward (F) and reverse (R) primers anchored in Exon 2 yields a 672 bp amplicon for the wild type *Spr*<sup>+</sup> allele and a 452 bp amplicon for the *Spr*<sup>Δ235</sup> mutant allele. (B) Genotyping assay for the *Spr*<sup>ECFP</sup> HDR allele: a three primer PCR assay was used where one forward primer (F1) was centered on the CRISPR cut site in Exon 2 so that it would only anneal to the wild type allele, one forward primer (F2) was placed in the polyubiquitin (PUB) sequence in the integrated cassette; and one common reverse primer (R) was nested in the right homology arm in Exon 2. This yields a 342 bp amplicon for the wild type *Spr*<sup>+</sup> allele with the intact gRNA site (amplified by F1/R), and a 524 bp amplicon for the *Spr*<sup>ECFP</sup> mutant allele (amplified by F2/R).

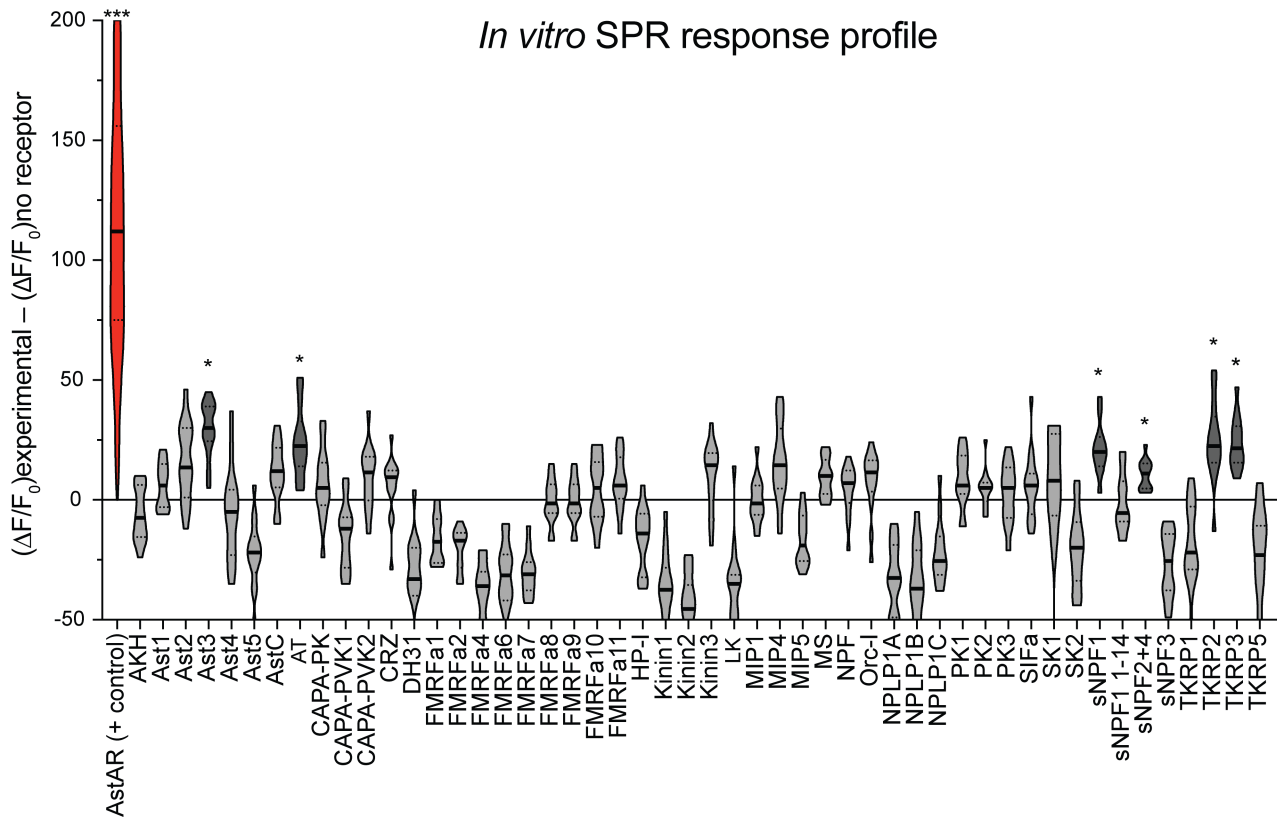

**Figure S2: *In vitro* *Aedes aegypti* SPR responses to neuropeptide panel.**

*In vitro* response profile of *Ae. aegypti* sex peptide receptor (AAEL019881) to a panel of 50 neuropeptides. Fluorescence signal was calculated as ( $\Delta F/F_0$ )<sub>experimental</sub> - ( $\Delta F/F_0$ )<sub>no receptor transfected control</sub>. AstAR (AAEL006076) response to Ast1 was used as a positive control in each plate. (n = 11 - 14 replicates/transfection). \* p < 0.001, \*\*\* p < 0.0001 (one sample t and Wilcoxon Signed Rank test, hypothetical value = 0).
